# Supplementary material
Source: PubMed Central journal article supplement (PMC5676560)
Supplement: NIHMS875294-supplement.pdf [file NIHMS875294-supplement.pdf]

# Supporting Information

## Verbenanone, an octahydro-5H-chromen-5-one from a Hawaiian-Plant Associated Fungus FT431

Chunshun Li<sup>a,b</sup>, Ariel M. Sarotti<sup>c</sup>, James Turkson<sup>b</sup>, and Shugeng Cao<sup>a,b,\*</sup>

<sup>a</sup>Department of Pharmaceutical Sciences, Daniel K. Inouye College of Pharmacy, University of Hawaii at Hilo, 200 West Kawili Street, Hilo, Hawaii'i 96720, United States

<sup>b</sup>Cancer Biology, University of Hawaii Cancer Center, 701 Ilalo Street, Honolulu, Hawaii'i 96813, United States

<sup>c</sup>Instituto de Química Rosario (CONICET), Facultad de Ciencias Bioquímicas y Farmacéuticas, Universidad Nacional de Rosario, Suipacha 531, Rosario 2000, Argentina.

### Content

|   |                                                                                 |                |
|---|---------------------------------------------------------------------------------|----------------|
| • | <i>Figure S1. <sup>1</sup>H NMR spectrum of compound 1</i>                      | <i>S2</i>      |
| • | <i>Figure S2. <sup>13</sup>C NMR spectrum of compound 1</i>                     | <i>S3</i>      |
| • | <i>Figure S3. <sup>1</sup>H-<sup>1</sup>H COSY spectrum of compound 1</i>       | <i>S4</i>      |
| • | <i>Figure S4. HSQC spectrum of compound 1</i>                                   | <i>S5</i>      |
| • | <i>Figure S5. HMBC spectrum of compound 1</i>                                   | <i>S6</i>      |
| • | <i>Figure S6. ROESY spectrum of compound 1</i>                                  | <i>S7</i>      |
| • | <i>Figure S7. HRMS of compound 1</i>                                            | <i>S8</i>      |
| • | <i>Figure S8. <sup>1</sup>H NMR spectrum of 1a (R-MTPA ester of compound 1)</i> | <i>S9</i>      |
| • | <i>Figure S9. 1H-1H COSY spectrum of 1a (R-MTPA ester of compound 1)</i>        | <i>S10</i>     |
| • | <i>Figure S10. 1H NMR spectrum of 1b (S-MTPA ester of compound 1)</i>           | <i>S11</i>     |
| • | <i>Figure S11. 1H-1H COSY spectrum of 1b (S-MTPA ester of compound 1)</i>       | <i>S12</i>     |
| • | <i>Figure S12. IR spectrum of compound 1</i>                                    | <i>S13</i>     |
| • | <i>Computational Methods</i>                                                    | <i>S14</i>     |
| • | <i>Figure S13. Structures of Isomers 1-32</i>                                   | <i>S15</i>     |
| • | <i>Table S1. Calculated shielding tensors of Isomers 1-32</i>                   | <i>S16-S17</i> |
| • | <i>Table S2. Calculated (scaled) chemical shifts of Isomers 1-32</i>            | <i>S18-S19</i> |
| • | <i>Table S3. DP4+ Results</i>                                                   | <i>S20</i>     |
| • | <i>Cartesian Coordinates</i>                                                    | <i>S21-S29</i> |

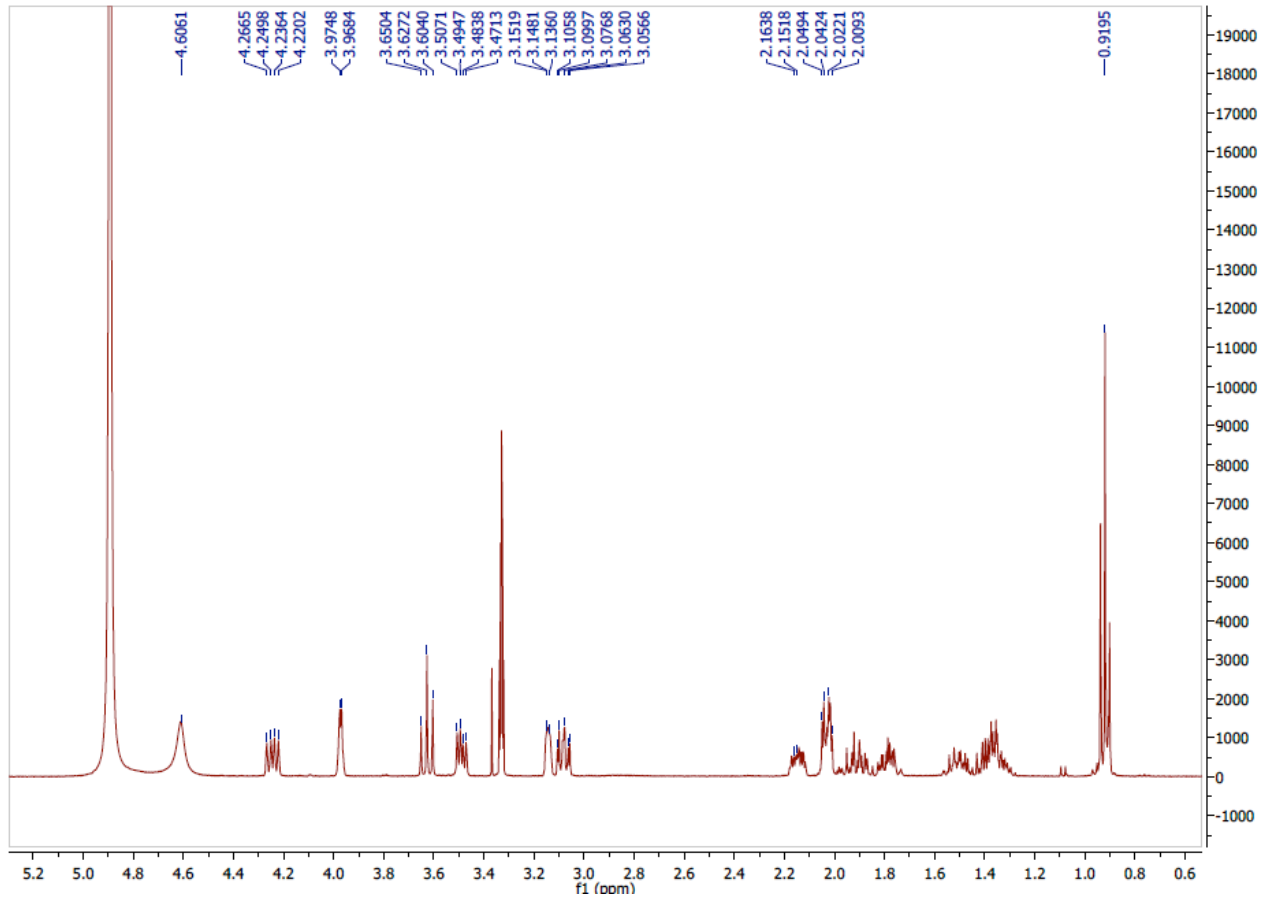

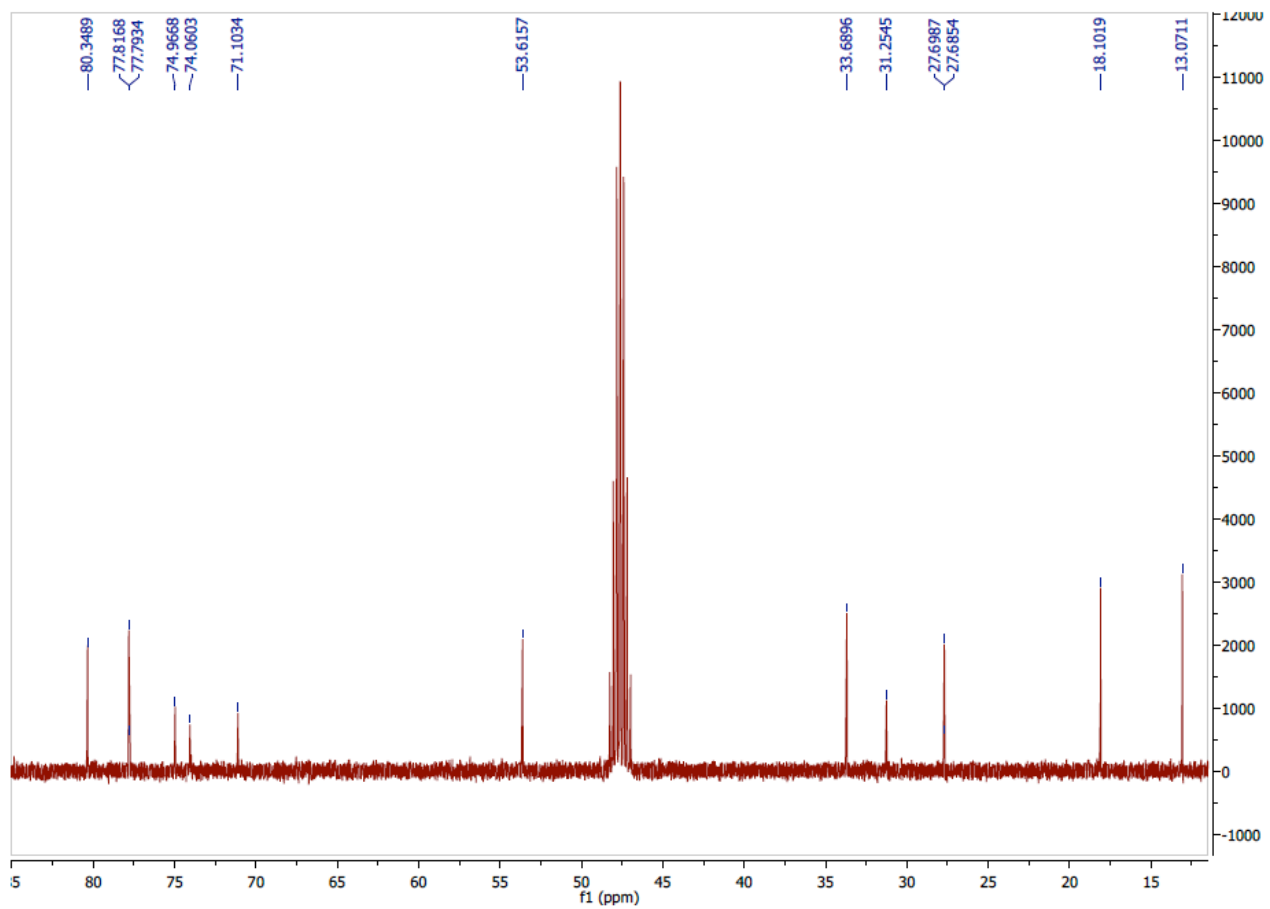

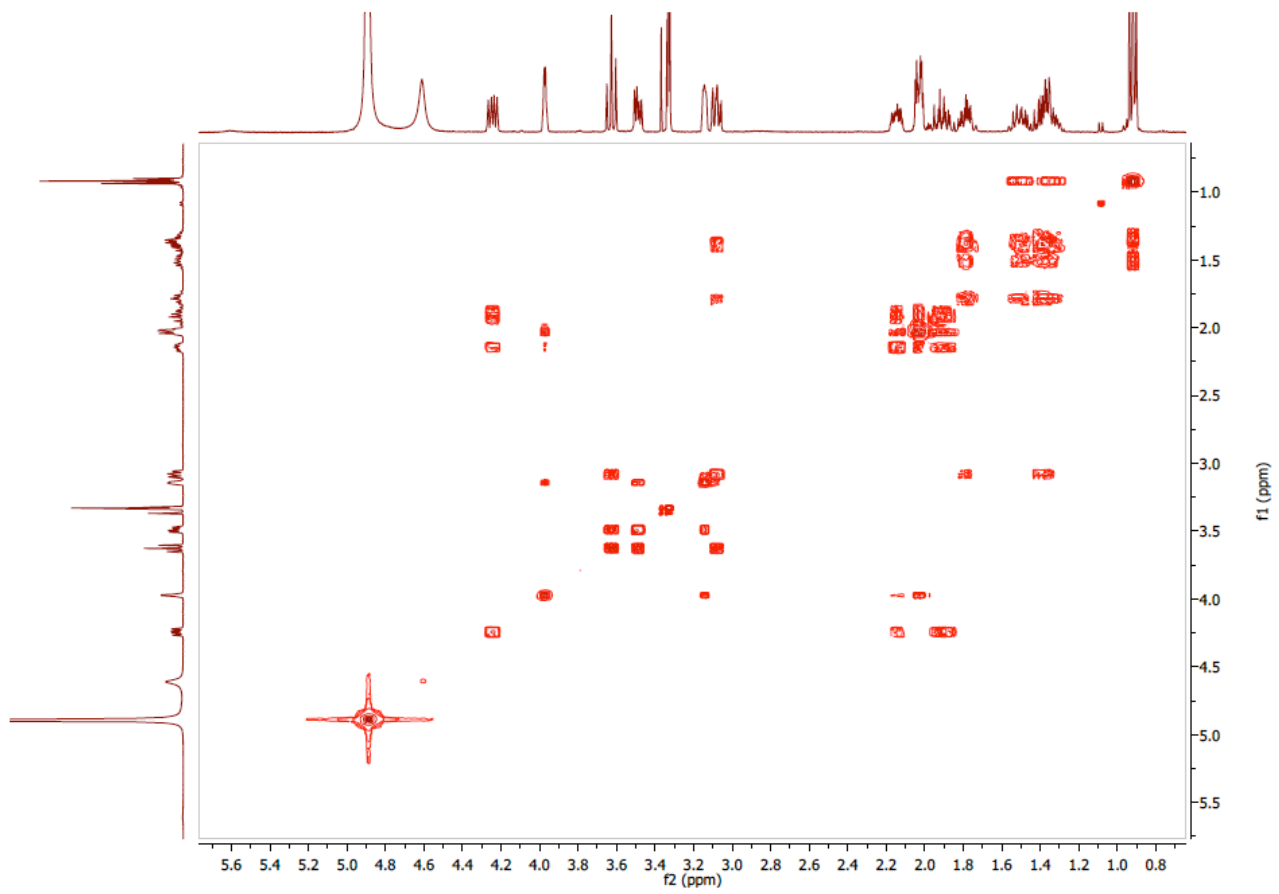

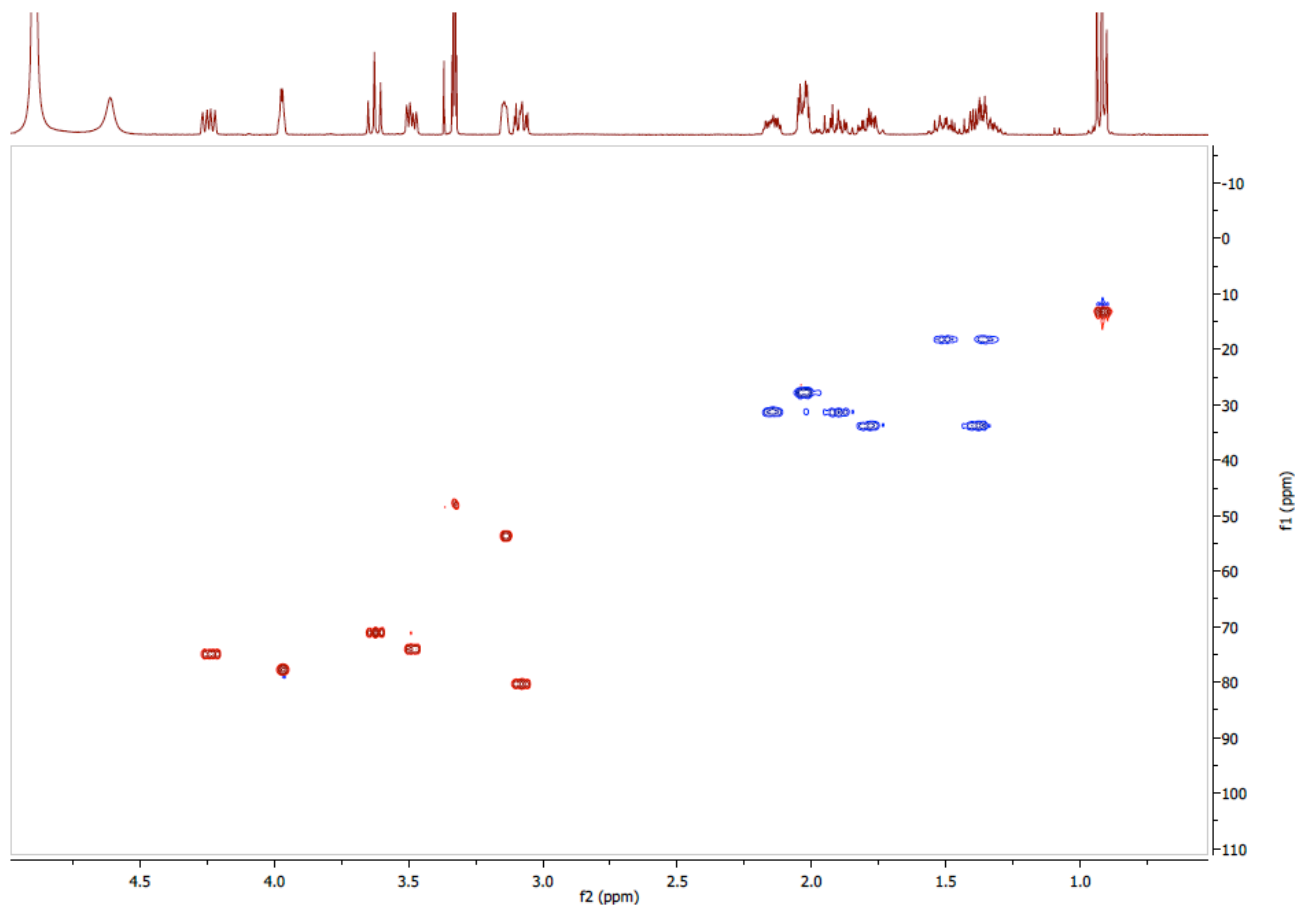

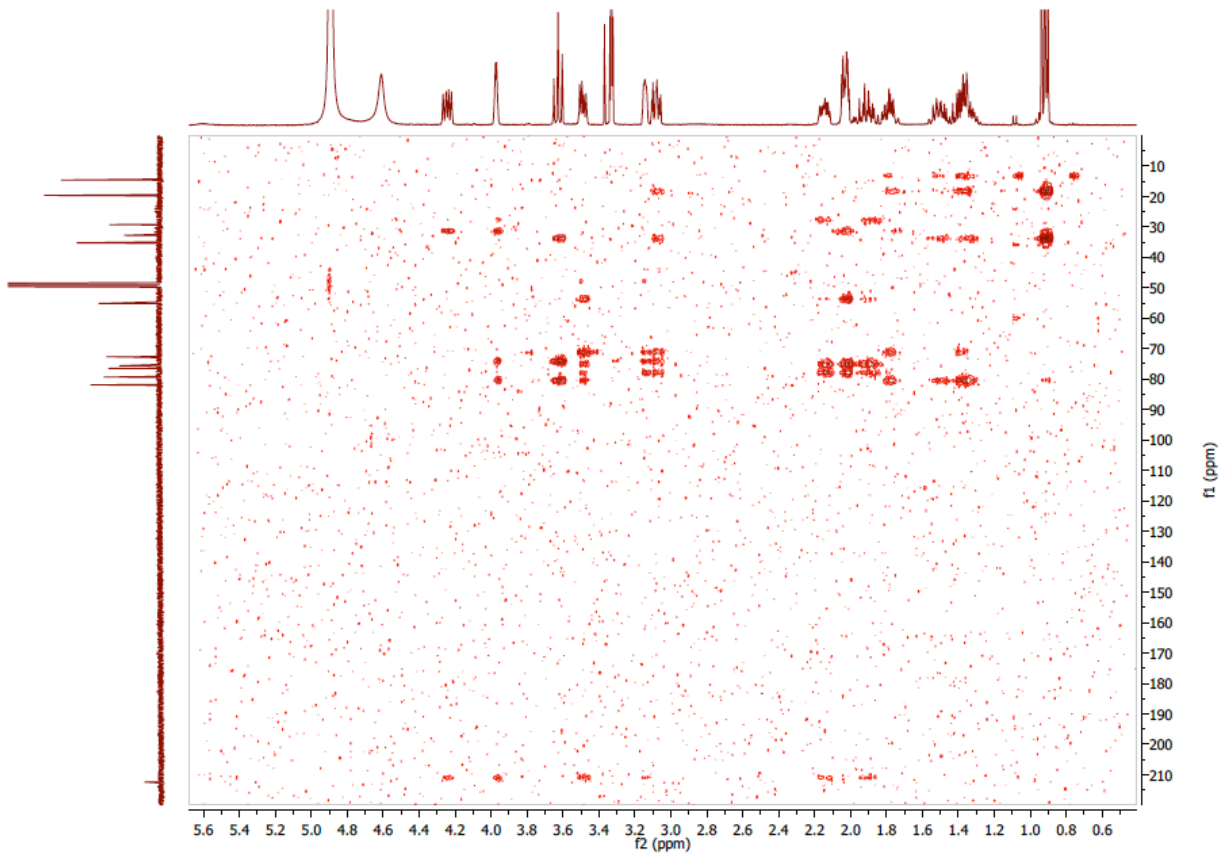

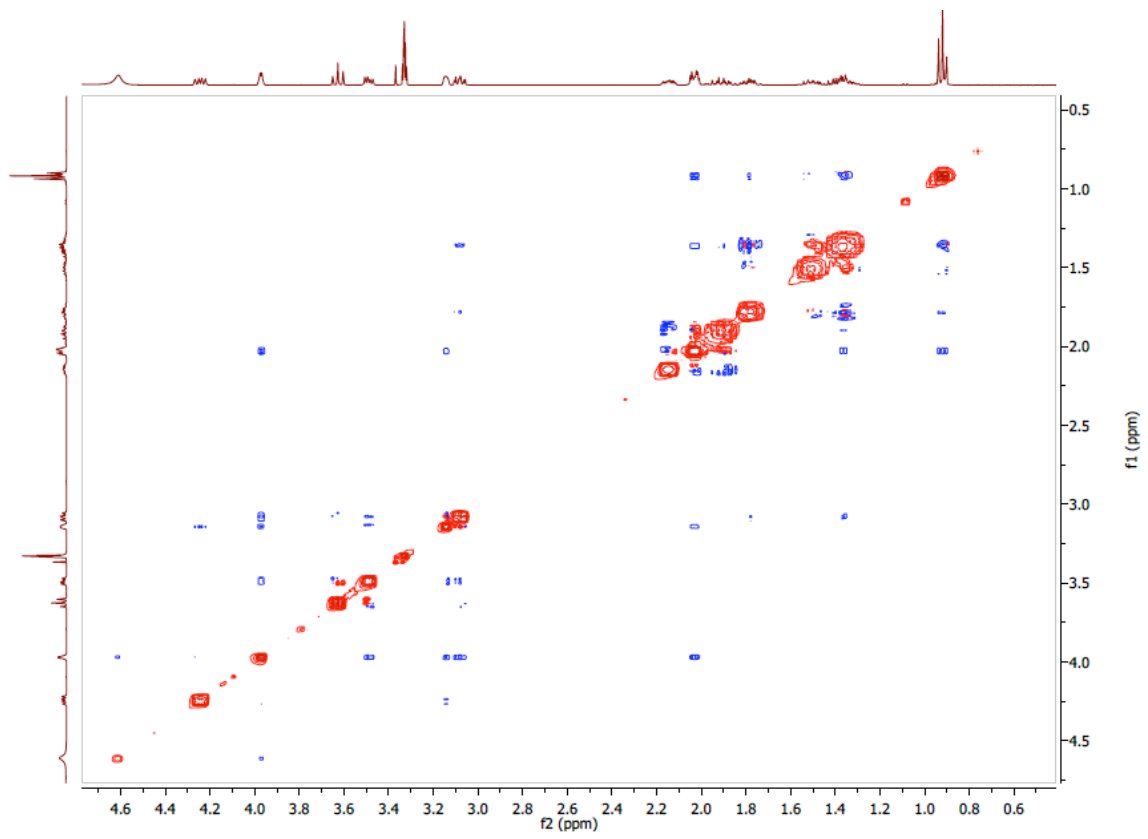

Synapt\_11881n\_LC 28 (0.688) Cm (28-38)

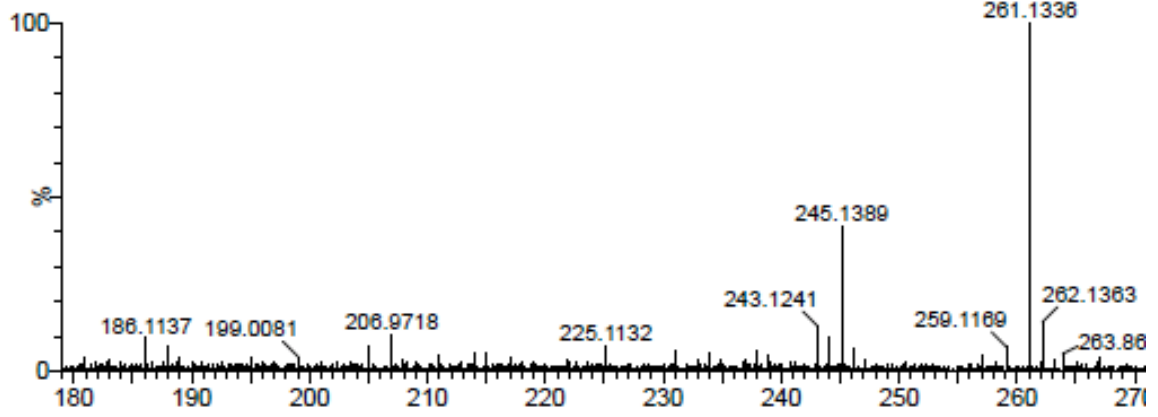



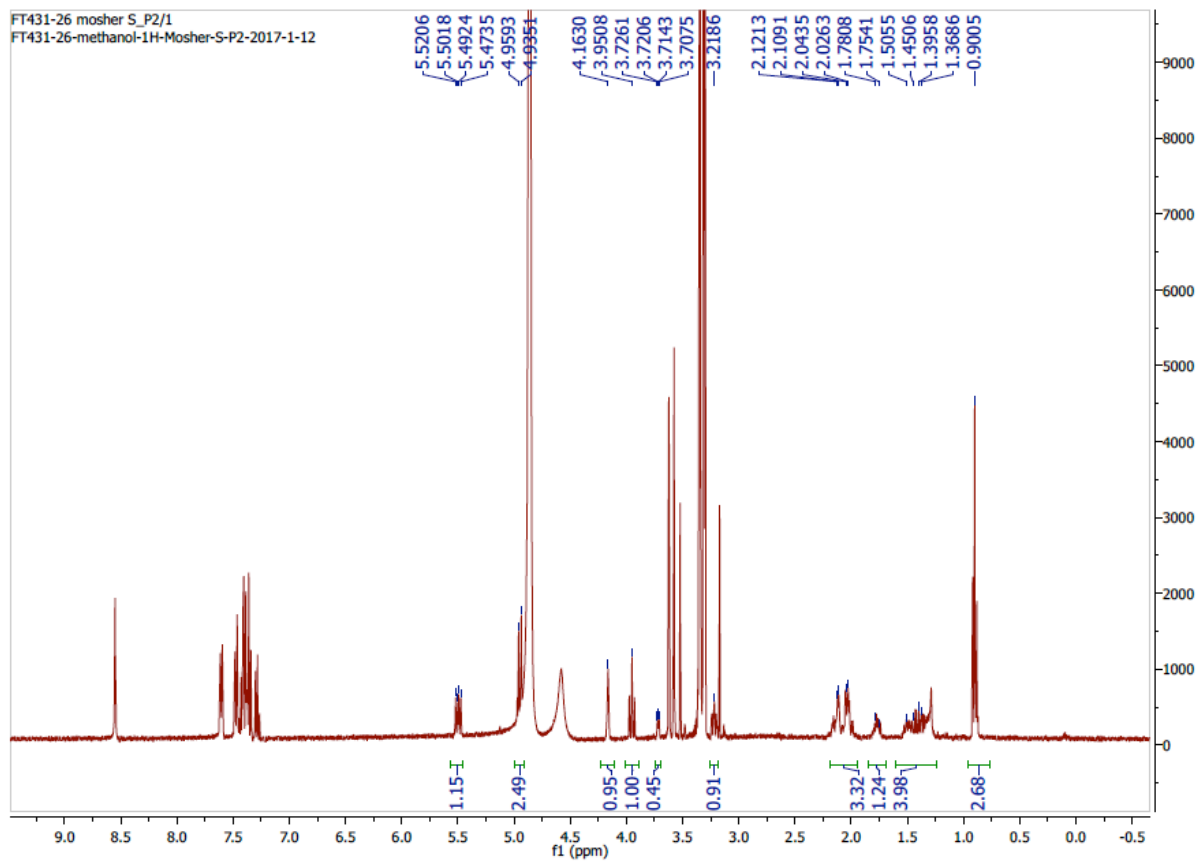

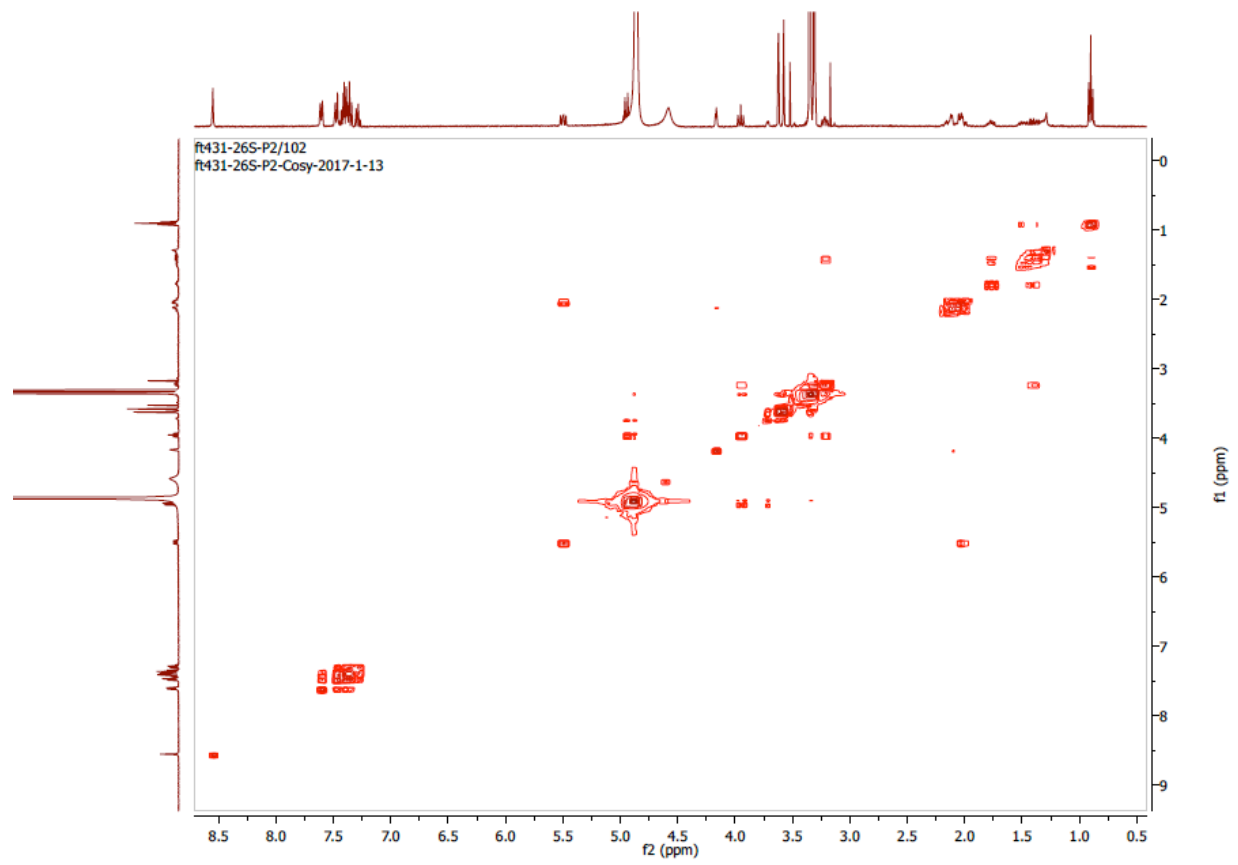

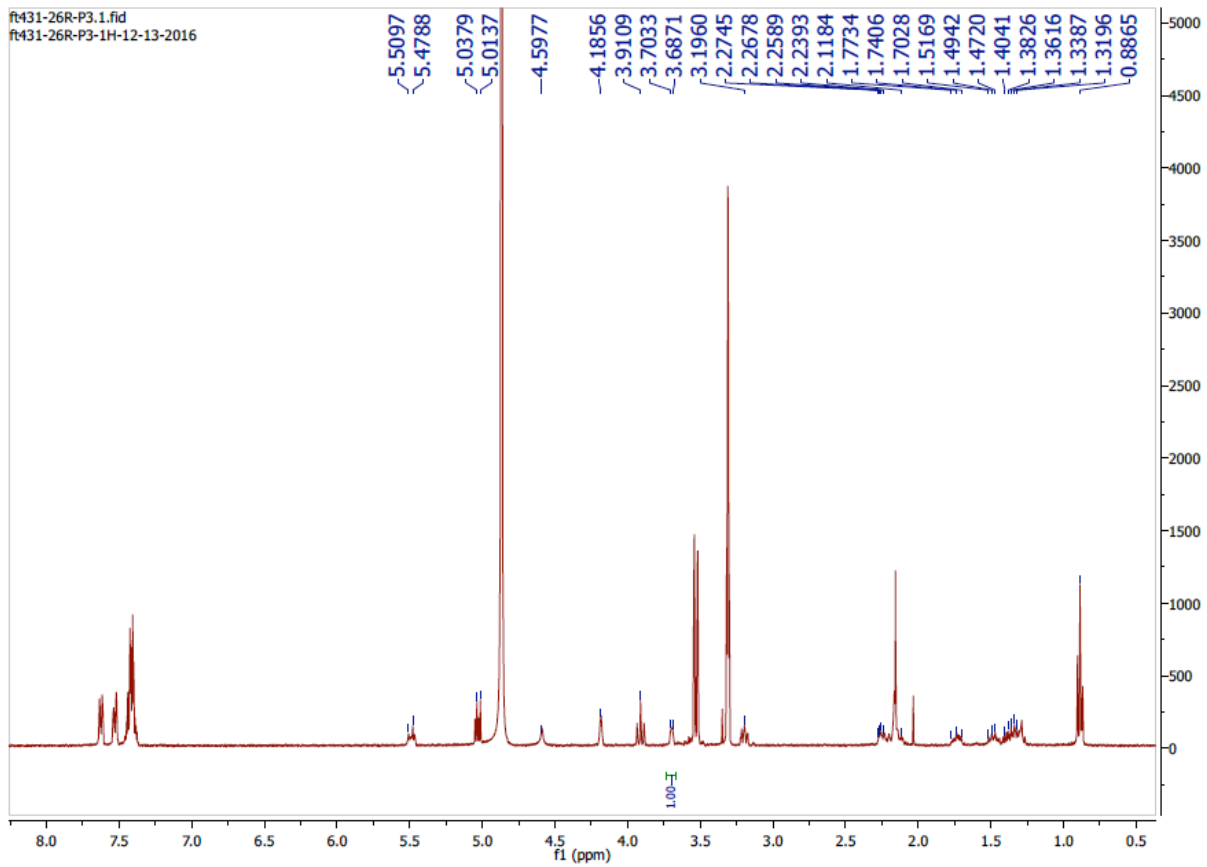

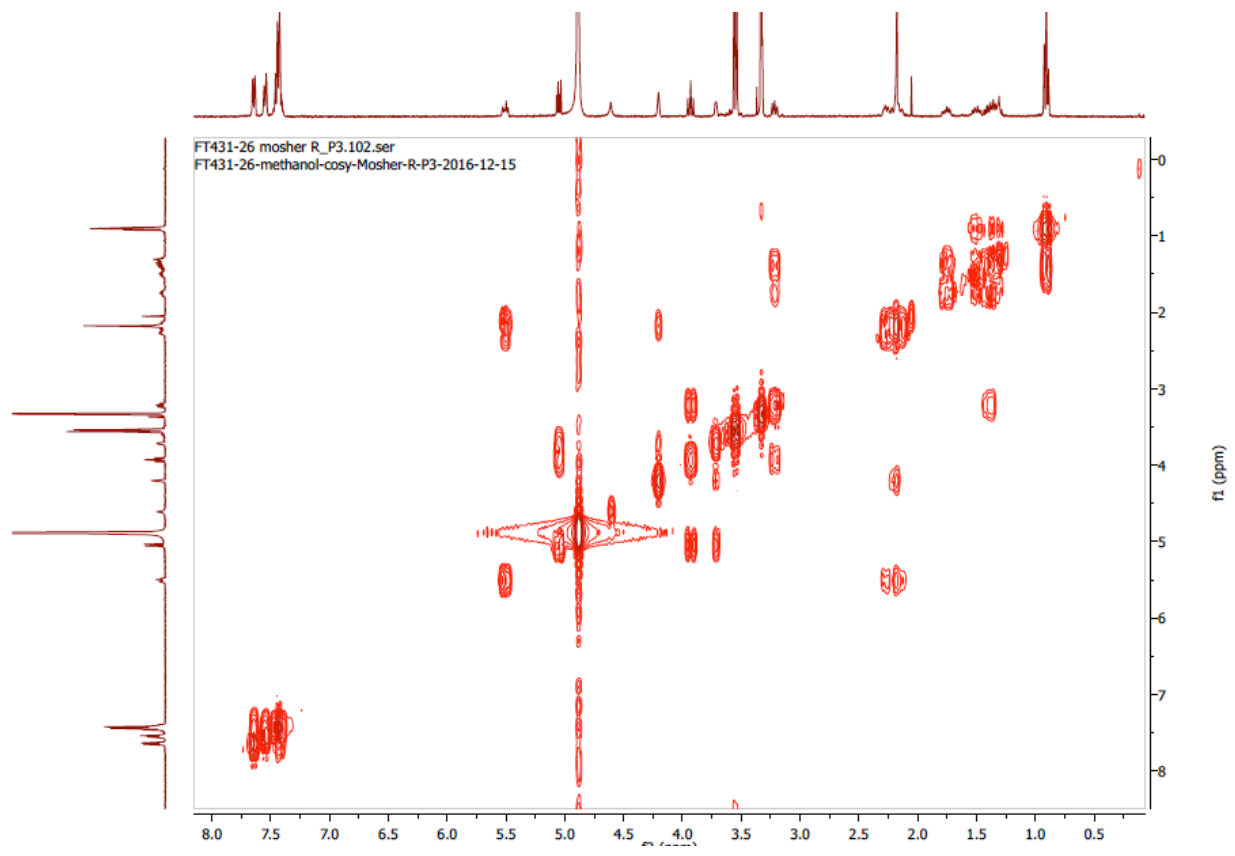

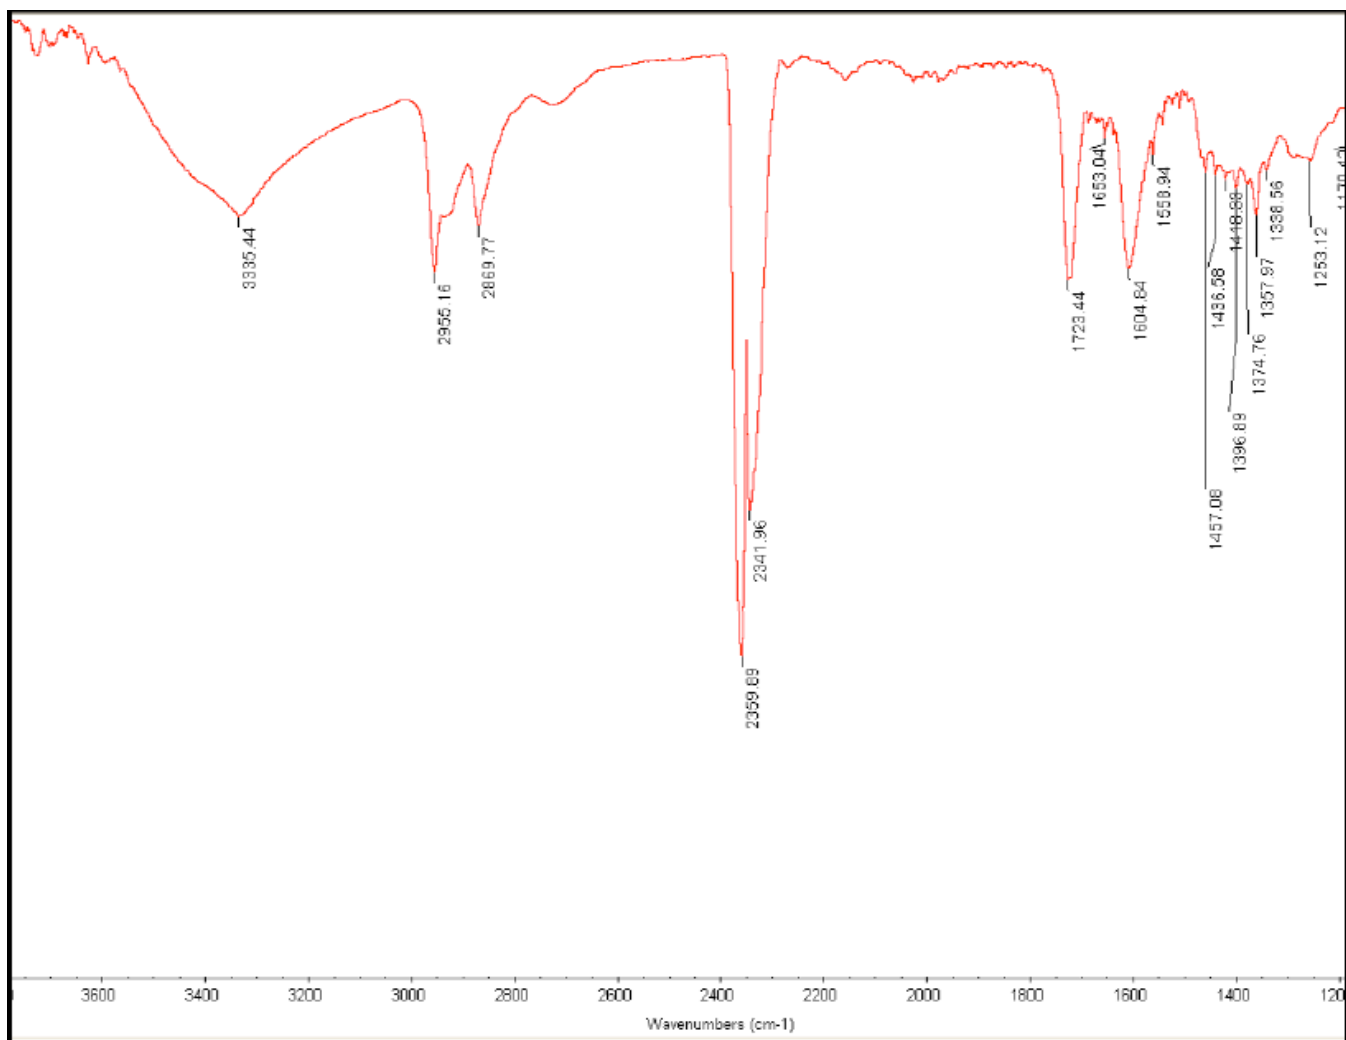

**Computational Methods.** All the quantum mechanical calculations were performed using Gaussian 09.<sup>1</sup> Systematic conformational searches were done for each compound in the gas phase using the MMFF force field, implemented in Spartan 08.<sup>2</sup> All conformers within 10 kcal/mol of the lowest energy conformer were subjected to further reoptimization at the PCM/B3LYP/6-31G\* level of theory using methanol as solvent. The choice for the 10 kcal/mol of cutoff was set as a balance between reducing the overall CPU calculation time and minimizing the possibility of losing further contributing conformers. Frequency calculations were done for all optimized geometries at the PCM/B3LYP/6-31G\* level to determine the nature of the stationary point found, and to compute the thermochemical properties (at 1 atm and 298.15 K). All the PCM/B3LYP/6-31G\* optimized geometries were next subjected to NMR calculations. The magnetic shielding constants ( $\sigma$ ) were computed using the gauge including atomic orbitals (GIAO) method,<sup>3</sup> the method of choice to solve the gauge origin problem,<sup>4</sup> at PCM/mPW1PW91/6-31+G\*\* level of theory, using the polarizable continuum model, PCM,<sup>5</sup> with methanol as the solvent. The unscaled chemical shifts ( $\delta_u$ ) were computed using TMS as reference standard according to  $\delta_u = \sigma_0 - \sigma_x$ , where  $\sigma_x$  is the Boltzmann averaged shielding tensor (over all significantly populated conformations) and  $\sigma_0$  is the shielding tensor of TMS computed at the same level of theory employed for  $\sigma_x$ . The Boltzmann averaging was done according to eq 1:

$$\sigma^x = \frac{\sum_i \sigma_i^x e^{(-E_i/RT)}}{\sum_i e^{(-E_i/RT)}} \quad (\text{eq. 1})$$

where  $\sigma_i^x$  is the shielding constant for nucleus  $x$  in conformer  $i$ ,  $R$  is the molar gas constant (8.3145 J K<sup>-1</sup> mol<sup>-1</sup>),  $T$  is the temperature (298 K), and  $E_i$  is the SCF energy of conformer  $i$  (relative to the lowest energy conformer), obtained at the PCM/mPW1PW91/6-31+G\*\* level of theory. The scaled chemical shifts ( $\delta_s$ ) were computed as  $\delta_s = (\delta_u - b)/m$ , where  $m$  and  $b$  are the slope and intercept, respectively, resulting from a linear regression calculation on a plot of  $\delta_u$  against  $\delta_{exp}$ .<sup>4</sup> The DP4+ calculations were carried out using the Excel spreadsheet available for free at sarotti-nmr.weebly.com, or as part of the Supporting Information of the original paper.<sup>6</sup>

#### References:

- 1) Frisch, M. J.; Trucks, G. W.; Schlegel, H. B.; Scuseria, G. E.; Robb, M. A.; Cheeseman, J. R.; Scalmani, G.; Barone, V.; Mennucci, B.; Petersson, G. A.; Nakatsuji, H.; Caricato, M.; Li, X.; Hratchian, H. P.; Izmaylov, A. F.; Bloino, J.; Zheng, G.; Sonnenberg, J. L.; Hada, M.; Ehara, M.; Toyota, K.; Fukuda, R.; Hasegawa, J.; Ishida, M.; Nakajima, T.; Honda, Y.; Kitao, O.; Nakai, H.; Vreven, T.; Montgomery, J. A., Jr.; Peralta, J. E.; Ogliaro, F.; Bearpark, M.; Heyd, J. J.; Brothers, E.; Kudin, K. N.; Staroverov, V. N.; Kobayashi, R.; Normand, J.; Raghavachari, K.; Rendell, A.; Burant, J. C.; Iyengar, S. S.; Tomasi, J.; Cossi, M.; Rega, N.; Millam, J. M.; Klene, M.; Knox, J. E.; Cross, J. B.; Bakken, V.; Adamo, C.; Jaramillo, J.; Gomperts, R.; Stratmann, R. E.; Yazyev, O.; Austin, A. J.; Cammi, R.; Pomelli, C.; Ochterski, J. W.; Martin, R. L.; Morokuma, K.; Zakrzewski, V. G.; Voth, G. A.; Salvador, P.; Dannenberg, J. J.; Dapprich, S.; Daniels, A. D.; Farkas, O.; Foresman, J. B.; Ortiz, J. V.; Cioslowski, J.; Fox, D. J. *Gaussian 09*, Gaussian, Inc.: Wallingford, CT, 2009.
- 2) Spartan'08; Wavefunction: Irvine, CA.
- 3) a) Ditchfield, R. *J. Chem. Phys.* **1972**, *56*, 5688. b) Ditchfield, R. *Mol. Phys.* **1974**, *27*, 789. c) Rohlfing, C. M.; Allen, L. C.; Ditchfield, R. *Chem. Phys.* **1984**, *87*, 9. d) Wolinski, K.; Hinton, J. F.; Pulay, P. *J. Am. Chem. Soc.* **1990**, *112*, 8251.
- 4) a) Grimblat, N.; Sarotti, A. M. *Chem. Eur. J.* **2016**, *22*, 12246. b) Lodewyk, M. W.; Siebert, M. R.; Tantillo, D. J. *Chem. Rev.* **2012**, *112*, 1839.
- 5) For a review on continuum solvation models, see: Tomasi, J.; Mennucci, B.; Cammi, R. *Chem. Rev.* **2005**, *105*, 2999.
- 6) Grimblat, N.; Zanardi, M. M.; Sarotti, A. M. *J. Org. Chem.* **2015**, *80*, 12526.

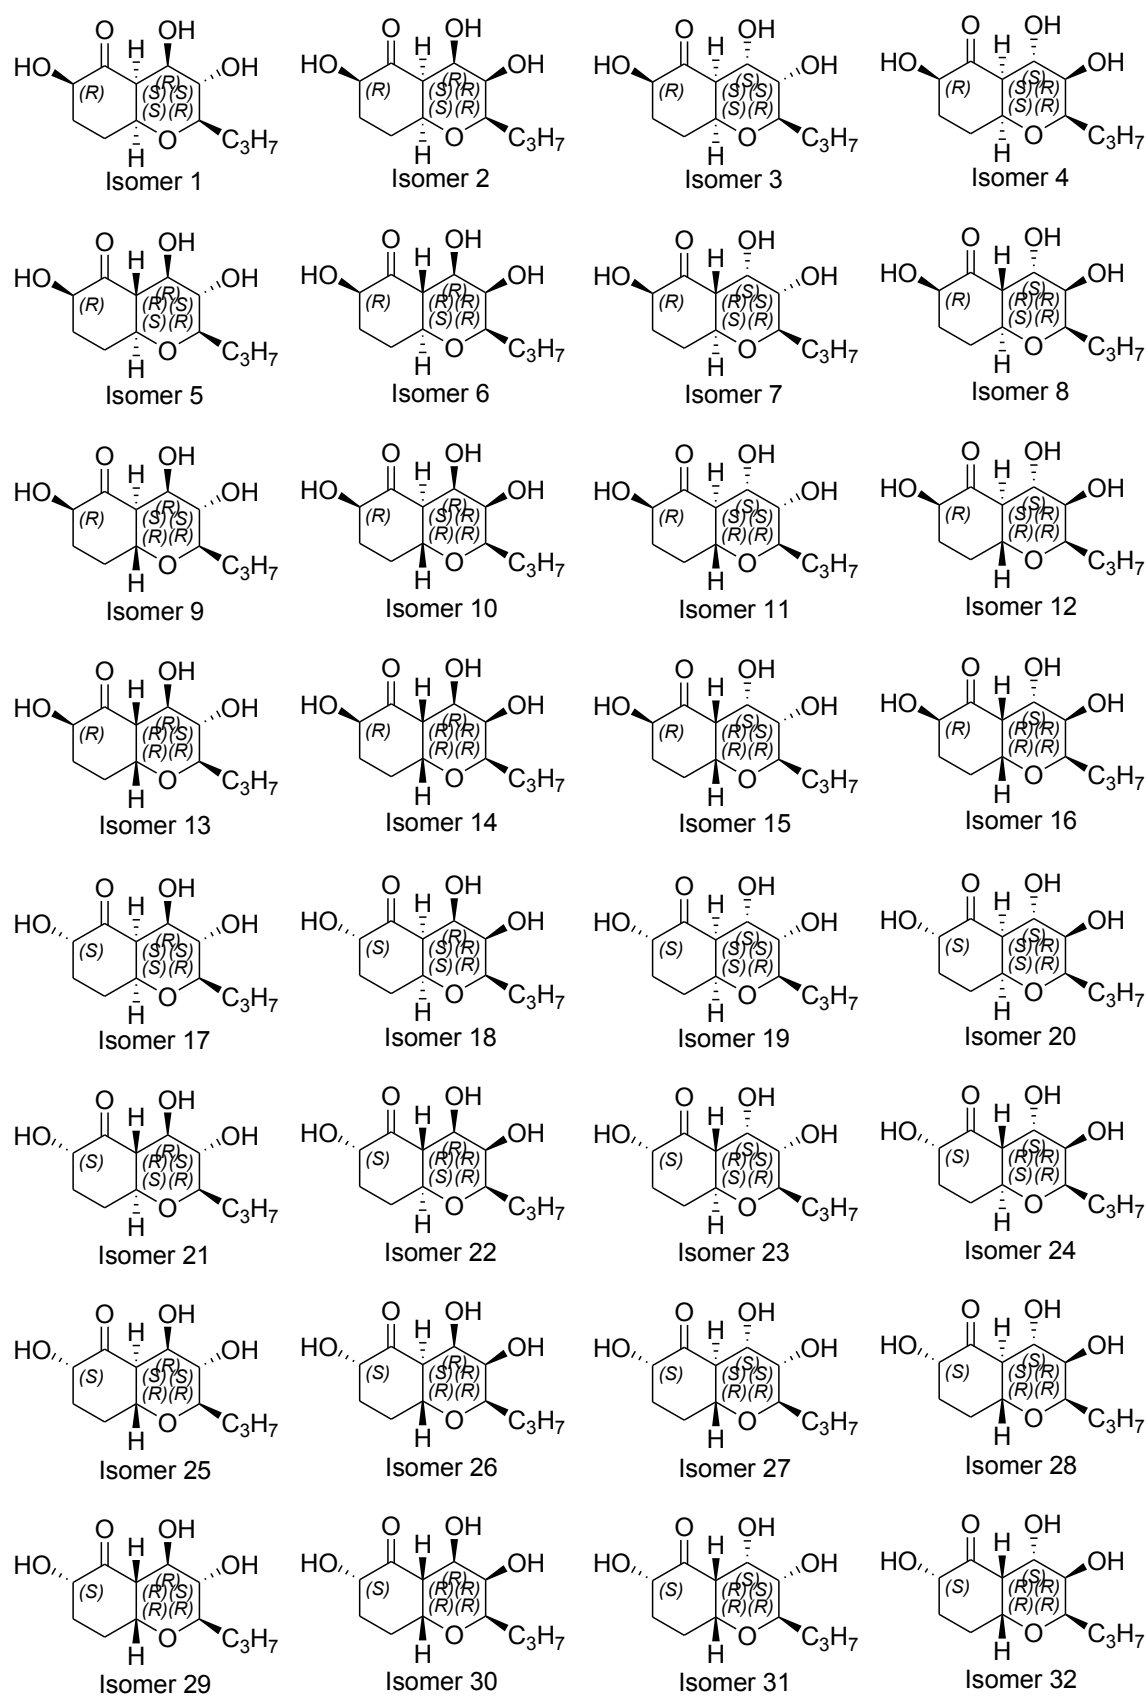

Figure S12. Structures of Isomers 1-32

**Table S1.** NMR Boltzmann averaged isotropic magnetic shielding values ( $\sigma$ ) calculated at the PCM/mPW1PW91/6-31+G\*\*//PCM/B3LYP/6-31G\* (solvent: MeOH) level of theory for all significantly populated conformers of Isomers 1-32.

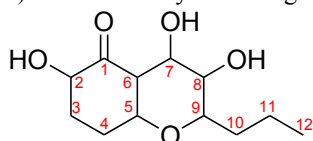

| Shielding Tensors |          |          |          |          |          |          |          |          |
|-------------------|----------|----------|----------|----------|----------|----------|----------|----------|
| Atom              | Isomer 1 | Isomer 2 | Isomer 3 | Isomer 4 | Isomer 5 | Isomer 6 | Isomer 7 | Isomer 8 |
| C-1               | -23.4442 | -24.6192 | -18.1452 | -23.9710 | -23.1534 | -22.2556 | -21.2058 | -22.7222 |
| C-2               | 119.4385 | 118.8024 | 119.5161 | 119.0259 | 122.1023 | 121.0696 | 118.8367 | 118.5394 |
| C-3               | 162.1287 | 157.2302 | 160.8190 | 157.1976 | 169.8284 | 167.2508 | 164.3656 | 164.5891 |
| C-4               | 165.9719 | 165.7785 | 167.0149 | 166.0343 | 169.3953 | 169.3111 | 168.5223 | 168.1236 |
| C-5               | 115.7863 | 113.1220 | 119.2641 | 115.7086 | 125.4721 | 120.5583 | 119.1846 | 117.4976 |
| C-6               | 142.1111 | 139.1995 | 140.2048 | 139.6225 | 141.1619 | 143.3718 | 139.8175 | 143.6511 |
| C-7               | 119.3329 | 124.9933 | 127.1662 | 126.1322 | 120.0491 | 123.6624 | 127.1969 | 125.7212 |
| C-8               | 122.8219 | 125.1532 | 125.9619 | 123.3830 | 120.1596 | 124.9762 | 123.7546 | 124.4446 |
| C-9               | 115.4249 | 114.6870 | 119.0739 | 116.2481 | 116.4438 | 117.2990 | 118.3535 | 119.4625 |
| C-10              | 160.3435 | 161.0344 | 159.8731 | 160.7596 | 160.3975 | 160.8467 | 159.9180 | 161.4111 |
| C-11              | 174.5795 | 174.1682 | 174.3952 | 174.1761 | 174.5200 | 174.0329 | 174.2480 | 174.1417 |
| C-12              | 180.9368 | 181.0311 | 180.8977 | 180.7136 | 180.8874 | 180.9995 | 180.8472 | 180.7241 |
| H-2               | 27.2294  | 27.0335  | 27.1988  | 26.9831  | 27.2606  | 27.5153  | 27.6704  | 27.6827  |
| H-3a              | 29.5171  | 29.6681  | 29.6677  | 29.6561  | 29.8078  | 29.6264  | 29.8526  | 29.8649  |
| H-3b              | 29.3022  | 29.2307  | 29.3281  | 29.2145  | 29.3852  | 29.5829  | 29.4268  | 29.4356  |
| H-4               | 29.5346  | 29.5778  | 29.5416  | 29.5745  | 29.4789  | 29.5186  | 29.5785  | 29.5627  |
| H-5               | 27.5345  | 27.6255  | 27.1548  | 27.1419  | 27.7911  | 28.0446  | 27.7223  | 27.6738  |
| H-6               | 28.5513  | 28.3029  | 28.6304  | 28.5041  | 29.1735  | 28.4872  | 28.2811  | 28.0709  |
| H-7               | 28.1722  | 27.8134  | 27.1270  | 27.0906  | 27.8379  | 27.6090  | 27.1173  | 27.2923  |
| H-8               | 28.1201  | 28.0048  | 28.1017  | 28.4245  | 28.2974  | 27.8344  | 28.4120  | 28.0887  |
| H-9a              | 28.3407  | 28.1534  | 28.0296  | 27.8406  | 28.2384  | 28.1131  | 28.0445  | 27.7013  |
| H-9b              | 30.2278  | 30.0589  | 30.3234  | 30.1621  | 30.1915  | 30.0523  | 30.2625  | 30.1599  |
| H-10a             | 29.7569  | 29.8874  | 29.8708  | 29.8739  | 29.7316  | 29.8037  | 29.7301  | 29.9341  |
| H-10b             | 30.1916  | 30.1758  | 30.2685  | 30.2050  | 30.1888  | 30.1779  | 30.2072  | 30.1978  |
| H-11              | 29.9715  | 30.0905  | 29.9734  | 30.0893  | 29.9451  | 30.0322  | 29.9477  | 30.0750  |
| H-12              | 30.6475  | 30.6321  | 30.6583  | 30.6337  | 30.6361  | 30.6179  | 30.6286  | 30.6283  |

  

| Shielding Tensors |          |           |           |           |           |           |           |           |
|-------------------|----------|-----------|-----------|-----------|-----------|-----------|-----------|-----------|
| Atom              | Isomer 9 | Isomer 10 | Isomer 11 | Isomer 12 | Isomer 13 | Isomer 14 | Isomer 15 | Isomer 16 |
| C-1               | -20.3719 | -19.0143  | -20.1516  | -17.8470  | -16.9325  | -19.4722  | -19.4885  | -20.3978  |
| C-2               | 119.5710 | 120.0040  | 119.7110  | 119.9951  | 121.8178  | 119.6876  | 118.8786  | 118.5517  |
| C-3               | 161.6510 | 161.8052  | 163.7036  | 163.3626  | 163.7934  | 165.4403  | 165.0362  | 165.7570  |
| C-4               | 165.4811 | 165.6225  | 165.6968  | 165.8957  | 170.5199  | 169.2306  | 168.2173  | 168.6221  |
| C-5               | 125.7661 | 127.1782  | 124.0669  | 123.9390  | 119.2363  | 130.2194  | 121.4153  | 120.9284  |
| C-6               | 142.3862 | 138.5096  | 141.3881  | 136.8842  | 135.7150  | 142.6571  | 141.0224  | 144.8673  |
| C-7               | 125.6181 | 126.7401  | 126.6529  | 125.7311  | 120.1208  | 125.0675  | 125.3141  | 123.1271  |
| C-8               | 124.6836 | 126.3962  | 123.6999  | 122.3611  | 123.2921  | 128.3932  | 123.8695  | 124.2186  |
| C-9               | 115.2139 | 117.2527  | 116.3050  | 117.7753  | 120.4562  | 117.6440  | 128.3369  | 126.3598  |
| C-10              | 163.6392 | 166.3957  | 163.7819  | 167.5624  | 163.3756  | 166.8808  | 161.4952  | 162.5753  |
| C-11              | 173.3806 | 173.4439  | 173.5251  | 173.9524  | 175.1590  | 173.6196  | 176.2532  | 174.4525  |
| C-12              | 181.2822 | 180.9829  | 181.2926  | 181.1465  | 180.0671  | 180.9470  | 181.7634  | 180.9004  |
| H-2               | 27.1053  | 27.1817   | 27.2732   | 27.2927   | 27.0570   | 27.3226   | 26.8395   | 27.0292   |
| H-3a              | 30.1436  | 30.1251   | 30.0146   | 30.0663   | 30.1591   | 29.7171   | 30.1271   | 30.0774   |
| H-3b              | 29.1614  | 29.1351   | 29.1773   | 29.1722   | 29.2054   | 29.3574   | 29.2286   | 29.2463   |
| H-4               | 29.6325  | 29.6620   | 29.5957   | 29.6432   | 29.4944   | 29.5360   | 29.2975   | 29.3649   |
| H-5               | 27.4799  | 27.5989   | 27.8952   | 27.8921   | 27.3959   | 27.1051   | 27.5659   | 27.4494   |
| H-6               | 28.7549  | 29.0696   | 28.6580   | 29.2010   | 28.7014   | 28.3454   | 28.7233   | 28.4953   |
| H-7               | 27.2476  | 27.0329   | 27.3129   | 27.4681   | 27.6486   | 27.1194   | 27.5348   | 27.5815   |
| H-8               | 27.9304  | 27.8329   | 27.7887   | 27.7798   | 28.0849   | 27.7451   | 28.0750   | 28.1506   |
| H-9a              | 27.7503  | 27.6098   | 27.5013   | 27.4454   | 27.6041   | 27.6491   | 27.5324   | 27.2850   |
| H-9b              | 30.1079  | 30.0696   | 30.3039   | 29.9888   | 30.0448   | 30.1405   | 29.9877   | 30.1607   |
| H-10a             | 29.3064  | 29.4355   | 29.8086   | 29.9172   | 29.5080   | 29.3948   | 29.9875   | 30.0098   |
| H-10b             | 30.2825  | 30.2997   | 30.2352   | 30.2530   | 30.1378   | 30.3612   | 30.1610   | 30.2040   |
| H-11              | 30.0630  | 29.9700   | 30.0303   | 29.9999   | 29.8026   | 29.9855   | 29.9496   | 30.0626   |
| H-12              | 30.6372  | 30.6159   | 30.6237   | 30.6071   | 30.5462   | 30.6305   | 30.6297   | 30.6182   |



**Table S1 (cont).** NMR Boltzmann averaged isotropic magnetic shielding values ( $\sigma$ ) calculated at the PCM/mPW1PW91/6-31+G\*\*//PCM/B3LYP/6-31G\* (solvent: MeOH) level of theory for all significantly populated conformers of Isomers 1-32.



| Shielding Tensors |           |           |           |           |           |           |           |           |
|-------------------|-----------|-----------|-----------|-----------|-----------|-----------|-----------|-----------|
| Atom              | Isomer 17 | Isomer 18 | Isomer 19 | Isomer 20 | Isomer 21 | Isomer 22 | Isomer 23 | Isomer 24 |
| C-1               | -25.0723  | -26.4178  | -19.0657  | -24.1925  | -17.6373  | -19.9299  | -18.5742  | -20.1608  |
| C-2               | 119.9050  | 121.1029  | 119.3970  | 118.1755  | 120.1330  | 119.8174  | 119.8968  | 119.7497  |
| C-3               | 166.7454  | 165.3513  | 165.0465  | 161.8182  | 163.0819  | 163.4990  | 161.8484  | 161.7086  |
| C-4               | 168.7934  | 168.7311  | 169.3488  | 168.6741  | 165.8069  | 166.0340  | 165.9676  | 165.5448  |
| C-5               | 118.1246  | 119.1777  | 121.3267  | 117.6124  | 116.8894  | 117.0346  | 119.1202  | 117.7013  |
| C-6               | 144.2042  | 146.0962  | 141.9913  | 141.9925  | 137.5984  | 141.2801  | 138.0446  | 141.7821  |
| C-7               | 118.7231  | 121.2069  | 126.0219  | 124.6944  | 122.2404  | 124.4100  | 127.3606  | 125.9458  |
| C-8               | 122.3197  | 124.8175  | 125.6813  | 124.2181  | 119.2261  | 124.9645  | 124.2152  | 124.7914  |
| C-9               | 115.3262  | 116.4401  | 118.8752  | 117.3551  | 114.6884  | 116.9362  | 118.2638  | 119.5643  |
| C-10              | 160.3865  | 160.6455  | 159.8577  | 160.9741  | 159.1014  | 161.0692  | 160.0334  | 161.6416  |
| C-11              | 174.4917  | 174.0515  | 174.2873  | 174.2539  | 172.5959  | 174.0617  | 174.3761  | 174.1984  |
| C-12              | 180.9950  | 180.7875  | 180.9675  | 180.8834  | 180.3551  | 181.0294  | 180.8397  | 180.8321  |
| H-2               | 27.3469   | 26.5443   | 27.3944   | 27.1926   | 27.2681   | 27.2716   | 27.1461   | 27.1174   |
| H-3a              | 29.6907   | 29.8744   | 29.7015   | 29.5946   | 30.0811   | 30.0416   | 30.1301   | 30.1803   |
| H-3b              | 29.3321   | 29.3129   | 29.3898   | 29.3605   | 29.1811   | 29.1820   | 29.1466   | 29.1661   |
| H-4               | 29.4475   | 29.4880   | 29.4827   | 29.5351   | 29.5774   | 29.5438   | 29.6086   | 29.5968   |
| H-5               | 27.6298   | 27.7665   | 27.2149   | 27.1533   | 28.1130   | 28.1706   | 27.7305   | 27.6537   |
| H-6               | 28.3112   | 28.5705   | 28.2659   | 28.1531   | 29.1267   | 28.7352   | 29.0511   | 28.8112   |
| H-7               | 28.1239   | 27.6013   | 27.1530   | 27.2120   | 27.7055   | 27.5421   | 27.0978   | 27.2355   |
| H-8               | 28.3187   | 28.0076   | 28.2338   | 28.3227   | 28.2796   | 27.7960   | 28.4308   | 28.0467   |
| H-9a              | 28.3786   | 28.1848   | 28.0504   | 27.8523   | 28.2056   | 28.0956   | 28.0452   | 27.7149   |
| H-9b              | 30.2499   | 30.0597   | 30.3454   | 30.1446   | 30.0889   | 30.0392   | 30.2648   | 30.1668   |
| H-10a             | 29.7871   | 29.8468   | 29.8550   | 29.9410   | 29.7507   | 29.8034   | 29.7407   | 29.9270   |
| H-10b             | 30.2091   | 30.1902   | 30.2606   | 30.2090   | 30.1832   | 30.1738   | 30.1964   | 30.1859   |
| H-11              | 29.9726   | 30.0661   | 29.9556   | 30.0954   | 29.7309   | 30.0345   | 29.9577   | 30.0685   |
| H-12              | 30.6490   | 30.6276   | 30.6535   | 30.6282   | 30.5974   | 30.6172   | 30.6368   | 30.6293   |

  

| Shielding Tensors |           |           |           |           |           |           |           |           |
|-------------------|-----------|-----------|-----------|-----------|-----------|-----------|-----------|-----------|
| Atom              | Isomer 25 | Isomer 26 | Isomer 27 | Isomer 28 | Isomer 29 | Isomer 30 | Isomer 31 | Isomer 32 |
| C-1               | -22.6756  | -21.3430  | -22.4888  | -20.2869  | -23.4424  | -18.7333  | -24.8156  | -23.9652  |
| C-2               | 118.2902  | 119.1319  | 121.0690  | 121.1261  | 119.1704  | 119.4857  | 118.7521  | 119.3893  |
| C-3               | 164.1367  | 164.5764  | 167.2397  | 166.5760  | 159.4801  | 160.9931  | 157.6714  | 162.3498  |
| C-4               | 168.1109  | 168.0213  | 169.1424  | 168.9854  | 166.1232  | 166.4849  | 165.7369  | 165.9726  |
| C-5               | 125.9571  | 127.4995  | 127.5279  | 126.1496  | 124.6008  | 127.6062  | 120.4270  | 123.1163  |
| C-6               | 144.3401  | 140.5734  | 143.5354  | 138.6685  | 139.8082  | 140.7067  | 139.4976  | 142.3623  |
| C-7               | 125.1997  | 126.6742  | 126.0041  | 125.0874  | 125.3983  | 126.3660  | 127.6639  | 123.2653  |
| C-8               | 124.3310  | 126.0504  | 123.8803  | 121.9201  | 123.5345  | 128.4393  | 124.4374  | 124.7753  |
| C-9               | 115.6263  | 117.3334  | 116.5712  | 118.4719  | 113.6642  | 117.8608  | 113.1784  | 117.6876  |
| C-10              | 163.5764  | 166.3465  | 163.7149  | 167.8711  | 161.9222  | 166.7182  | 162.8348  | 168.5431  |
| C-11              | 173.4361  | 173.4869  | 173.5404  | 174.2511  | 173.6482  | 173.7253  | 173.7005  | 174.1939  |
| C-12              | 181.1027  | 180.9315  | 181.1818  | 181.4040  | 181.0804  | 180.8726  | 181.1261  | 180.8041  |
| H-2               | 27.6817   | 27.6988   | 27.5394   | 27.6730   | 27.0437   | 27.2022   | 27.0535   | 27.2629   |
| H-3a              | 29.8433   | 29.8545   | 29.6202   | 29.7137   | 29.6223   | 29.6036   | 29.6314   | 29.4654   |
| H-3b              | 29.4573   | 29.4326   | 29.5696   | 29.5193   | 29.2621   | 29.3243   | 29.2444   | 29.3444   |
| H-4               | 29.5960   | 29.6515   | 29.5738   | 29.6101   | 29.5994   | 29.6057   | 29.6210   | 29.5896   |
| H-5               | 27.4829   | 27.6172   | 27.7720   | 27.8085   | 27.0279   | 27.0105   | 27.3375   | 27.2615   |
| H-6               | 28.0469   | 28.3518   | 28.4127   | 28.7672   | 28.6738   | 28.6266   | 28.3559   | 28.5909   |
| H-7               | 27.2990   | 27.0824   | 27.3704   | 27.5286   | 27.2216   | 27.0690   | 27.6671   | 27.9127   |
| H-8               | 27.9946   | 27.8316   | 27.8052   | 27.7287   | 28.3024   | 27.5415   | 28.0358   | 27.5990   |
| H-9a              | 27.7246   | 27.6095   | 27.5247   | 27.4167   | 27.7494   | 27.6071   | 27.4392   | 27.3898   |
| H-9b              | 30.1492   | 30.0985   | 30.3260   | 30.0072   | 30.1169   | 30.1035   | 30.2709   | 30.0759   |
| H-10a             | 29.2142   | 29.3997   | 29.8291   | 29.8877   | 29.5860   | 29.3936   | 29.8880   | 29.9250   |
| H-10b             | 30.2758   | 30.3293   | 30.2505   | 30.2478   | 30.2485   | 30.3521   | 30.2430   | 30.2703   |
| H-11              | 30.0453   | 29.9410   | 30.0053   | 29.9874   | 30.0621   | 29.9895   | 30.0983   | 30.0117   |
| H-12              | 30.6338   | 30.6252   | 30.6282   | 30.6148   | 30.6341   | 30.6323   | 30.6412   | 30.6385   |

**Table S2.** Experimental NMR shifts ( $\delta_{exp}$ ) of **1** and calculated (scaled) NMR chemical shifts ( $\delta_{sc}$ ) of Isomers 1-32, computed at the PCM/mPW1PW91/6-31+G\*\*//PCM/B3LYP/6-31G\* (solvent: MeOH) level of theory.

| Atom  | $\delta_{exp}$ | $\delta_{sc}$ |             |             |             |             |             |             |             |
|-------|----------------|---------------|-------------|-------------|-------------|-------------|-------------|-------------|-------------|
|       |                | Isomer 1      | Isomer 2    | Isomer 3    | Isomer 4    | Isomer 5    | Isomer 6    | Isomer 7    | Isomer 8    |
| C-1   | 210.0          | 212.0         | 212.9       | 213.5       | 213.4       | 212.8       | 213.2       | 213.2       | 213.3       |
| C-2   | 75.0           | 73.7          | 73.9        | 75.7        | 74.1        | 72.8        | 74.2        | 75.9        | 76.2        |
| C-3   | 31.3           | 32.3          | 36.7        | 34.3        | 36.9        | 26.8        | 29.4        | 31.3        | 31.5        |
| C-4   | 27.7           | 28.6          | 28.4        | 28.1        | 28.3        | 27.2        | 27.4        | 27.2        | 28.1        |
| C-5   | 77.8           | 77.2          | 79.4        | 75.9        | 77.3        | 69.6        | 74.7        | 75.6        | 77.2        |
| C-6   | 53.6           | 51.7          | 54.1        | 54.9        | 54.0        | 54.4        | 52.6        | 55.3        | 51.8        |
| C-7   | 74.1           | 73.8          | 67.9        | 68.0        | 67.2        | 74.8        | 71.7        | 67.7        | 69.2        |
| C-8   | 71.1           | 70.4          | 67.8        | 69.2        | 69.9        | 74.7        | 70.4        | 71.1        | 70.5        |
| C-9   | 80.3           | 77.6          | 77.9        | 76.1        | 76.8        | 78.3        | 77.8        | 76.4        | 75.3        |
| C-10  | 33.7           | 34.1          | 33.0        | 35.2        | 33.4        | 35.9        | 35.6        | 35.6        | 34.6        |
| C-11  | 18.1           | 20.3          | 20.3        | 20.7        | 20.4        | 22.3        | 22.8        | 21.6        | 22.2        |
| C-12  | 13.1           | 14.1          | 13.6        | 14.2        | 14.0        | 16.2        | 16.1        | 15.1        | 15.8        |
|       | <b>CMAE</b>    | <b>1.3</b>    | <b>2.3</b>  | <b>2.4</b>  | <b>2.2</b>  | <b>2.9</b>  | <b>2.1</b>  | <b>2.2</b>  | <b>2.1</b>  |
|       | <b>CMAxErr</b> | <b>2.7</b>    | <b>6.2</b>  | <b>6.1</b>  | <b>6.9</b>  | <b>8.2</b>  | <b>4.7</b>  | <b>6.4</b>  | <b>5.0</b>  |
| H-2   | 4.24           | 4.32          | 4.52        | 4.35        | 4.57        | 4.29        | 4.04        | 3.88        | 3.87        |
| H-3a  | 1.90           | 2.03          | 1.88        | 1.88        | 1.89        | 1.74        | 1.92        | 1.70        | 1.69        |
| H-3b  | 2.14           | 2.25          | 2.32        | 2.22        | 2.34        | 2.17        | 1.97        | 2.12        | 2.11        |
| H-4   | 2.03           | 2.02          | 1.97        | 2.01        | 1.98        | 2.07        | 2.03        | 1.97        | 1.99        |
| H-5   | 3.97           | 4.02          | 3.92        | 4.40        | 4.41        | 3.76        | 3.51        | 3.83        | 3.88        |
| H-6   | 3.15           | 3.00          | 3.25        | 2.92        | 3.05        | 2.38        | 3.06        | 3.27        | 3.48        |
| H-7   | 3.49           | 3.38          | 3.74        | 4.42        | 4.46        | 3.71        | 3.94        | 4.43        | 4.26        |
| H-8   | 3.63           | 3.43          | 3.55        | 3.45        | 3.13        | 3.25        | 3.72        | 3.14        | 3.46        |
| H-9a  | 3.08           | 3.21          | 3.40        | 3.52        | 3.71        | 3.31        | 3.44        | 3.51        | 3.85        |
| H-9b  | 1.38           | 1.32          | 1.49        | 1.23        | 1.39        | 1.36        | 1.50        | 1.29        | 1.39        |
| H-10a | 1.78           | 1.79          | 1.66        | 1.68        | 1.68        | 1.82        | 1.75        | 1.82        | 1.62        |
| H-10b | 1.35           | 1.36          | 1.37        | 1.28        | 1.35        | 1.36        | 1.37        | 1.34        | 1.35        |
| H-11  | 1.49           | 1.58          | 1.46        | 1.58        | 1.46        | 1.61        | 1.52        | 1.60        | 1.48        |
| H-12  | 0.92           | 0.90          | 0.92        | 0.89        | 0.92        | 0.91        | 0.93        | 0.92        | 0.92        |
|       | <b>CMAE</b>    | <b>0.09</b>   | <b>0.10</b> | <b>0.17</b> | <b>0.19</b> | <b>0.18</b> | <b>0.15</b> | <b>0.22</b> | <b>0.22</b> |
|       | <b>CMAxErr</b> | <b>0.19</b>   | <b>0.21</b> | <b>0.63</b> | <b>0.69</b> | <b>0.72</b> | <b>0.49</b> | <b>0.92</b> | <b>0.65</b> |

  

| Atom  | $\delta_{exp}$ | $\delta_{sc}$ |             |             |             |             |             |             |             |
|-------|----------------|---------------|-------------|-------------|-------------|-------------|-------------|-------------|-------------|
|       |                | Isomer 9      | Isomer 10   | Isomer 11   | Isomer 12   | Isomer 13   | Isomer 14   | Isomer 15   | Isomer 16   |
| C-1   | 210.0          | 213.9         | 214.3       | 213.6       | 212.7       | 211.6       | 214.4       | 214.1       | 213.9       |
| C-2   | 75.0           | 75.6          | 75.9        | 75.6        | 75.5        | 73.4        | 77.3        | 77.4        | 77.5        |
| C-3   | 31.3           | 34.0          | 34.2        | 32.2        | 32.3        | 31.5        | 32.2        | 31.9        | 31.2        |
| C-4   | 27.7           | 30.3          | 30.4        | 30.2        | 29.8        | 24.8        | 28.5        | 28.7        | 28.4        |
| C-5   | 77.8           | 69.5          | 68.7        | 71.3        | 71.6        | 75.9        | 66.9        | 74.9        | 75.2        |
| C-6   | 53.6           | 53.1          | 57.4        | 54.2        | 58.7        | 59.5        | 54.7        | 55.6        | 51.7        |
| C-7   | 74.1           | 69.7          | 69.2        | 68.7        | 69.8        | 75.0        | 72.0        | 71.1        | 73.0        |
| C-8   | 71.1           | 70.6          | 69.5        | 71.7        | 73.1        | 71.9        | 68.7        | 72.5        | 71.9        |
| C-9   | 80.3           | 79.9          | 78.6        | 78.9        | 77.7        | 74.7        | 79.3        | 68.1        | 69.8        |
| C-10  | 33.7           | 32.1          | 29.7        | 32.1        | 28.2        | 31.9        | 30.8        | 35.4        | 34.3        |
| C-11  | 18.1           | 22.5          | 22.7        | 22.5        | 21.8        | 20.2        | 24.2        | 20.8        | 22.6        |
| C-12  | 13.1           | 14.7          | 15.1        | 14.8        | 14.6        | 15.3        | 16.9        | 15.3        | 16.3        |
|       | <b>CMAE</b>    | <b>2.6</b>    | <b>3.6</b>  | <b>2.5</b>  | <b>3.1</b>  | <b>2.3</b>  | <b>3.2</b>  | <b>3.0</b>  | <b>2.7</b>  |
|       | <b>CMAxErr</b> | <b>8.3</b>    | <b>9.1</b>  | <b>6.5</b>  | <b>6.2</b>  | <b>5.9</b>  | <b>10.9</b> | <b>12.2</b> | <b>10.5</b> |
| H-2   | 4.24           | 4.45          | 4.37        | 4.28        | 4.26        | 4.49        | 4.23        | 4.71        | 4.52        |
| H-3a  | 1.90           | 1.41          | 1.43        | 1.54        | 1.48        | 1.39        | 1.83        | 1.42        | 1.47        |
| H-3b  | 2.14           | 2.39          | 2.42        | 2.37        | 2.38        | 2.35        | 2.19        | 2.32        | 2.30        |
| H-4   | 2.03           | 1.92          | 1.89        | 1.95        | 1.91        | 2.06        | 2.01        | 2.25        | 2.19        |
| H-5   | 3.97           | 4.07          | 3.95        | 3.66        | 3.66        | 4.15        | 4.45        | 3.98        | 4.10        |
| H-6   | 3.15           | 2.80          | 2.48        | 2.89        | 2.35        | 2.85        | 3.21        | 2.83        | 3.06        |
| H-7   | 3.49           | 4.30          | 4.52        | 4.24        | 4.08        | 3.90        | 4.43        | 4.02        | 3.97        |
| H-8   | 3.63           | 3.62          | 3.72        | 3.76        | 3.77        | 3.47        | 3.81        | 3.48        | 3.40        |
| H-9a  | 3.08           | 3.80          | 3.94        | 4.05        | 4.11        | 3.95        | 3.90        | 4.02        | 4.27        |
| H-9b  | 1.38           | 1.44          | 1.48        | 1.25        | 1.56        | 1.51        | 1.41        | 1.56        | 1.39        |
| H-10a | 1.78           | 2.24          | 2.12        | 1.74        | 1.63        | 2.04        | 2.16        | 1.56        | 1.54        |
| H-10b | 1.35           | 1.27          | 1.25        | 1.32        | 1.30        | 1.41        | 1.19        | 1.39        | 1.35        |
| H-11  | 1.49           | 1.49          | 1.58        | 1.52        | 1.55        | 1.75        | 1.56        | 1.60        | 1.49        |
| H-12  | 0.92           | 0.91          | 0.93        | 0.93        | 0.94        | 1.00        | 0.92        | 0.92        | 0.93        |
|       | <b>CMAE</b>    | <b>0.24</b>   | <b>0.29</b> | <b>0.23</b> | <b>0.29</b> | <b>0.21</b> | <b>0.19</b> | <b>0.25</b> | <b>0.21</b> |
|       | <b>CMAxErr</b> | <b>0.55</b>   | <b>0.77</b> | <b>0.79</b> | <b>0.95</b> | <b>0.68</b> | <b>0.52</b> | <b>0.70</b> | <b>0.90</b> |

**Table S2 (cont).** Experimental NMR shifts ( $\delta_{exp}$ ) of **1** and calculated (scaled) NMR chemical shifts ( $\delta_{sc}$ ) of Isomers 1-32, computed at the PCM/mPW1PW91/6-31+G\*\*//PCM/B3LYP/6-31G\* (solvent: MeOH) level of theory.

|       |                | $\delta_{sc}$ |             |             |             |             |             |             |             |
|-------|----------------|---------------|-------------|-------------|-------------|-------------|-------------|-------------|-------------|
| Atom  | $\delta_{exp}$ | Isomer 17     | Isomer 18   | Isomer 19   | Isomer 20   | Isomer 21   | Isomer 22   | Isomer 23   | Isomer 24   |
| C-1   | 210.0          | 212.0         | 213.6       | 213.3       | 213.2       | 211.2       | 212.6       | 213.2       | 213.5       |
| C-2   | 75.0           | 73.8          | 73.2        | 76.3        | 75.7        | 73.2        | 74.7        | 74.9        | 75.1        |
| C-3   | 31.3           | 29.2          | 31.1        | 31.1        | 33.6        | 30.2        | 31.6        | 32.9        | 33.5        |
| C-4   | 27.7           | 27.2          | 27.9        | 26.8        | 27.0        | 27.5        | 29.1        | 28.8        | 29.7        |
| C-5   | 77.8           | 75.5          | 75.1        | 74.4        | 76.3        | 76.5        | 77.4        | 75.6        | 77.1        |
| C-6   | 53.6           | 50.7          | 49.5        | 53.9        | 52.8        | 55.7        | 53.5        | 56.7        | 53.3        |
| C-7   | 74.1           | 75.0          | 73.1        | 69.7        | 69.5        | 71.1        | 70.2        | 67.4        | 68.9        |
| C-8   | 71.1           | 71.5          | 69.7        | 70.0        | 69.9        | 74.1        | 69.6        | 70.5        | 70.1        |
| C-9   | 80.3           | 78.2          | 77.7        | 76.8        | 76.5        | 78.7        | 77.5        | 76.5        | 75.2        |
| C-10  | 33.7           | 35.2          | 35.6        | 36.2        | 34.4        | 34.2        | 34.0        | 34.8        | 33.6        |
| C-11  | 18.1           | 21.8          | 22.9        | 22.0        | 21.6        | 20.7        | 21.2        | 20.4        | 21.2        |
| C-12  | 13.1           | 15.6          | 16.4        | 15.3        | 15.2        | 12.9        | 14.3        | 14.0        | 14.6        |
|       | <b>CMAE</b>    | <b>1.8</b>    | <b>2.3</b>  | <b>2.2</b>  | <b>2.1</b>  | <b>1.6</b>  | <b>1.5</b>  | <b>2.2</b>  | <b>2.1</b>  |
|       | <b>CMAxErr</b> | <b>3.7</b>    | <b>4.8</b>  | <b>4.4</b>  | <b>4.6</b>  | <b>3.0</b>  | <b>3.9</b>  | <b>6.7</b>  | <b>5.2</b>  |
| H-2   | 4.24           | 4.20          | 5.01        | 4.16        | 4.36        | 4.28        | 4.28        | 4.40        | 4.43        |
| H-3a  | 1.90           | 1.86          | 1.68        | 1.85        | 1.96        | 1.47        | 1.51        | 1.42        | 1.37        |
| H-3b  | 2.14           | 2.22          | 2.24        | 2.16        | 2.19        | 2.37        | 2.37        | 2.40        | 2.38        |
| H-4   | 2.03           | 2.10          | 2.06        | 2.07        | 2.02        | 1.97        | 2.01        | 1.94        | 1.95        |
| H-5   | 3.97           | 3.92          | 3.78        | 4.34        | 4.40        | 3.44        | 3.38        | 3.82        | 3.90        |
| H-6   | 3.15           | 3.24          | 2.98        | 3.28        | 3.40        | 2.42        | 2.82        | 2.50        | 2.74        |
| H-7   | 3.49           | 3.43          | 3.95        | 4.40        | 4.34        | 3.84        | 4.01        | 4.45        | 4.32        |
| H-8   | 3.63           | 3.23          | 3.54        | 3.32        | 3.23        | 3.27        | 3.75        | 3.12        | 3.50        |
| H-9a  | 3.08           | 3.17          | 3.37        | 3.50        | 3.70        | 3.34        | 3.45        | 3.51        | 3.84        |
| H-9b  | 1.38           | 1.30          | 1.49        | 1.21        | 1.41        | 1.46        | 1.51        | 1.29        | 1.38        |
| H-10a | 1.78           | 1.76          | 1.70        | 1.70        | 1.61        | 1.80        | 1.75        | 1.81        | 1.62        |
| H-10b | 1.35           | 1.34          | 1.36        | 1.29        | 1.34        | 1.37        | 1.38        | 1.35        | 1.36        |
| H-11  | 1.49           | 1.58          | 1.48        | 1.59        | 1.46        | 1.82        | 1.52        | 1.59        | 1.48        |
| H-12  | 0.92           | 0.90          | 0.92        | 0.90        | 0.92        | 0.95        | 0.93        | 0.91        | 0.92        |
|       | <b>CMAE</b>    | <b>0.09</b>   | <b>0.17</b> | <b>0.17</b> | <b>0.16</b> | <b>0.27</b> | <b>0.21</b> | <b>0.28</b> | <b>0.24</b> |
|       | <b>CMAxErr</b> | <b>0.35</b>   | <b>0.48</b> | <b>0.65</b> | <b>0.60</b> | <b>0.67</b> | <b>0.59</b> | <b>0.90</b> | <b>0.62</b> |

  

|       |                | $\delta_{sc}$ |             |             |             |             |             |             |             |
|-------|----------------|---------------|-------------|-------------|-------------|-------------|-------------|-------------|-------------|
| Atom  | $\delta_{exp}$ | Isomer 25     | Isomer 26   | Isomer 27   | Isomer 28   | Isomer 29   | Isomer 30   | Isomer 31   | Isomer 32   |
| C-1   | 210.0          | 213.8         | 214.3       | 214.2       | 213.0       | 214.0       | 214.6       | 213.9       | 213.8       |
| C-2   | 75.0           | 76.9          | 76.8        | 75.0        | 74.9        | 74.8        | 76.8        | 74.7        | 75.5        |
| C-3   | 31.3           | 32.4          | 32.4        | 30.2        | 30.6        | 35.5        | 35.5        | 37.0        | 34.1        |
| C-4   | 27.7           | 28.5          | 29.0        | 28.4        | 28.2        | 29.0        | 30.0        | 29.2        | 30.6        |
| C-5   | 77.8           | 69.5          | 68.7        | 68.7        | 70.0        | 69.5        | 68.7        | 73.1        | 71.9        |
| C-6   | 53.6           | 51.6          | 55.9        | 53.2        | 57.8        | 54.7        | 55.7        | 54.6        | 53.4        |
| C-7   | 74.1           | 70.2          | 69.5        | 70.2        | 71.1        | 68.7        | 70.0        | 66.1        | 71.8        |
| C-8   | 71.1           | 71.1          | 70.1        | 72.2        | 74.2        | 70.5        | 67.9        | 69.2        | 70.3        |
| C-9   | 80.3           | 79.5          | 78.6        | 79.3        | 77.5        | 80.2        | 78.4        | 80.1        | 77.2        |
| C-10  | 33.7           | 32.9          | 30.6        | 33.6        | 29.3        | 33.1        | 29.8        | 32.0        | 28.1        |
| C-11  | 18.1           | 23.4          | 23.7        | 24.1        | 23.1        | 21.6        | 22.8        | 21.5        | 22.7        |
| C-12  | 13.1           | 15.9          | 16.4        | 16.7        | 16.1        | 14.4        | 15.7        | 14.3        | 16.3        |
|       | <b>CMAE</b>    | <b>2.6</b>    | <b>3.3</b>  | <b>2.6</b>  | <b>3.1</b>  | <b>2.5</b>  | <b>3.7</b>  | <b>2.8</b>  | <b>3.0</b>  |
|       | <b>CMAxErr</b> | <b>8.3</b>    | <b>9.1</b>  | <b>9.1</b>  | <b>7.8</b>  | <b>8.3</b>  | <b>9.1</b>  | <b>8.0</b>  | <b>5.9</b>  |
| H-2   | 4.24           | 3.87          | 3.85        | 4.01        | 3.88        | 4.51        | 4.35        | 4.50        | 4.29        |
| H-3a  | 1.90           | 1.71          | 1.70        | 1.93        | 1.84        | 1.93        | 1.95        | 1.92        | 2.09        |
| H-3b  | 2.14           | 2.09          | 2.12        | 1.98        | 2.03        | 2.29        | 2.23        | 2.31        | 2.21        |
| H-4   | 2.03           | 1.95          | 1.90        | 1.98        | 1.94        | 1.95        | 1.94        | 1.93        | 1.96        |
| H-5   | 3.97           | 4.07          | 3.93        | 3.78        | 3.74        | 4.52        | 4.54        | 4.21        | 4.29        |
| H-6   | 3.15           | 3.50          | 3.20        | 3.14        | 2.78        | 2.88        | 2.92        | 3.19        | 2.96        |
| H-7   | 3.49           | 4.25          | 4.47        | 4.18        | 4.02        | 4.33        | 4.48        | 3.88        | 3.64        |
| H-8   | 3.63           | 3.56          | 3.72        | 3.75        | 3.82        | 3.25        | 4.01        | 3.51        | 3.95        |
| H-9a  | 3.08           | 3.83          | 3.94        | 4.03        | 4.13        | 3.80        | 3.94        | 4.11        | 4.16        |
| H-9b  | 1.38           | 1.40          | 1.45        | 1.22        | 1.54        | 1.43        | 1.45        | 1.28        | 1.47        |
| H-10a | 1.78           | 2.34          | 2.15        | 1.72        | 1.66        | 1.96        | 2.16        | 1.66        | 1.63        |
| H-10b | 1.35           | 1.27          | 1.22        | 1.30        | 1.30        | 1.30        | 1.20        | 1.31        | 1.28        |
| H-11  | 1.49           | 1.51          | 1.61        | 1.55        | 1.56        | 1.49        | 1.56        | 1.45        | 1.54        |
| H-12  | 0.92           | 0.92          | 0.93        | 0.92        | 0.94        | 0.92        | 0.92        | 0.91        | 0.91        |
|       | <b>CMAE</b>    | <b>0.25</b>   | <b>0.25</b> | <b>0.20</b> | <b>0.25</b> | <b>0.20</b> | <b>0.19</b> | <b>0.14</b> | <b>0.16</b> |
|       | <b>CMAxErr</b> | <b>0.57</b>   | <b>0.77</b> | <b>0.79</b> | <b>0.99</b> | <b>0.59</b> | <b>0.51</b> | <b>0.74</b> | <b>0.81</b> |

**Table S3.** DP4+ probability values (%) obtained after correlating the experimental NMR shifts of **1** with the calculated NMR data of Isomers 1-32.

| <b>Isomer N°</b> | <b>DP4+<br/>(H data)</b> | <b>DP4+<br/>(C data)</b> | <b>DP4+<br/>(all data)</b> |
|------------------|--------------------------|--------------------------|----------------------------|
| <i>1</i>         | <i>14.46</i>             | <i>99.92</i>             | <b><i>100.00</i></b>       |
| 2                | 0.05                     | 0.00                     | <b>0.00</b>                |
| 3                | 0.00                     | 0.00                     | <b>0.00</b>                |
| 4                | 0.00                     | 0.00                     | <b>0.00</b>                |
| 5                | 0.00                     | 0.00                     | <b>0.00</b>                |
| 6                | 0.00                     | 0.00                     | <b>0.00</b>                |
| 7                | 0.00                     | 0.00                     | <b>0.00</b>                |
| 8                | 0.00                     | 0.00                     | <b>0.00</b>                |
| 9                | 0.00                     | 0.00                     | <b>0.00</b>                |
| 10               | 0.00                     | 0.00                     | <b>0.00</b>                |
| 11               | 0.00                     | 0.00                     | <b>0.00</b>                |
| 12               | 0.00                     | 0.00                     | <b>0.00</b>                |
| 13               | 0.00                     | 0.00                     | <b>0.00</b>                |
| 14               | 0.00                     | 0.00                     | <b>0.00</b>                |
| 15               | 0.00                     | 0.00                     | <b>0.00</b>                |
| 16               | 0.00                     | 0.00                     | <b>0.00</b>                |
| 17               | 85.49                    | 0.00                     | <b>0.00</b>                |
| 18               | 0.00                     | 0.00                     | <b>0.00</b>                |
| 19               | 0.00                     | 0.00                     | <b>0.00</b>                |
| 20               | 0.00                     | 0.00                     | <b>0.00</b>                |
| 21               | 0.00                     | 0.05                     | <b>0.00</b>                |
| 22               | 0.00                     | 0.02                     | <b>0.00</b>                |
| 23               | 0.00                     | 0.00                     | <b>0.00</b>                |
| 24               | 0.00                     | 0.00                     | <b>0.00</b>                |
| 25               | 0.00                     | 0.00                     | <b>0.00</b>                |
| 26               | 0.00                     | 0.00                     | <b>0.00</b>                |
| 27               | 0.00                     | 0.00                     | <b>0.00</b>                |
| 28               | 0.00                     | 0.00                     | <b>0.00</b>                |
| 29               | 0.00                     | 0.00                     | <b>0.00</b>                |
| 30               | 0.00                     | 0.00                     | <b>0.00</b>                |
| 31               | 0.00                     | 0.00                     | <b>0.00</b>                |
| 32               | 0.00                     | 0.00                     | <b>0.00</b>                |

Cartesian Coordinates of the global minima conformation found for each isomer at the PCM/B3LYP/6-31G\* level of theory.

### Isomer 1

B3LYP/6-31G\* geometry

O 0 2.043347 2.847364 0.066811  
C 0 1.332300 1.713488 0.560858  
C 0 -0.660214 0.205353 0.209314  
C 0 1.311034 -0.722567 1.220067  
O 0 0.239338 -0.909009 0.295880  
C 0 2.206728 0.460702 0.754670  
C 0 0.112466 1.419989 -0.322768  
C 0 3.007158 0.070370 -0.475029  
C 0 3.745122 -1.261046 -0.432145  
C 0 2.781273 -2.385501 -0.014397  
C 0 2.079850 -2.041421 1.305246  
O 0 -0.747407 2.553144 -0.335572  
C 0 -1.828828 -0.200563 -0.682912  
C 0 -2.685531 -1.335082 -0.106273  
C 0 -3.847122 -1.724072 -1.026038  
O 0 4.354729 -1.534867 -1.673780  
O 0 3.102318 0.774398 -1.476895  
H 0 2.473710 2.544252 -0.755655  
H 0 0.954638 2.016740 1.544993  
H 0 -1.032081 0.447560 1.219768  
H 0 0.896863 -0.466460 2.207505  
H 0 2.943444 0.658578 1.547397  
H 0 0.456959 1.188524 -1.343208  
H 0 4.515229 -1.156629 0.353621  
H 0 2.043766 -2.525223 -0.812152  
H 0 3.348049 -3.317761 0.077346  
H 0 1.377886 -2.836055 1.578806  
H 0 2.813125 -1.965769 2.118247  
H 0 -0.155884 3.317761 -0.454658  
H 0 -2.448012 0.689702 -0.846851  
H 0 -1.428565 -0.494262 -1.663695  
H 0 -3.080159 -1.026666 0.872253  
H 0 -2.049674 -2.209178 0.078408  
H 0 -4.445147 -2.532853 -0.590772  
H 0 -3.481815 -2.067070 -2.001963  
H 0 -4.515229 -0.872128 -1.203372  
H 0 4.236883 -0.724496 -2.207505  
Free Energy (PCM/B3LYP/6-31G\*) = -845.158852  
Number of imaginary frequencies = 0

### Isomer 2

B3LYP/6-31G\* geometry

O 0 -2.172568 3.046442 -0.380247  
C 0 -1.429053 1.932695 -0.848705  
C 0 0.633397 0.490823 -0.428745  
C 0 -1.331062 -0.559734 -1.275542  
O 0 -0.253958 -0.637848 -0.344872  
C 0 -2.252595 0.620881 -0.847214  
C 0 -0.088137 1.811753 -0.087156  
C 0 -2.906099 0.213542 0.455269  
C 0 -3.765346 -1.040336 0.401196  
C 0 -2.812606 -2.197676 0.003612  
C 0 -2.070196 -1.898006 -1.304614  
O 0 -0.280582 2.035679 1.309383  
C 0 1.833679 0.211259 0.471885  
C 0 2.658201 -1.008055 0.041325  
C 0 3.851993 -1.267335 0.965917  
O 0 -4.396300 -1.277813 1.639138  
O 0 -2.698482 0.732694 1.549760  
H 0 -1.952060 3.116375 0.567037  
H 0 -1.192362 2.131287 -1.901627  
H 0 0.974848 0.576253 -1.475033  
H 0 -0.930781 -0.339162 -2.277453  
H 0 -3.055504 0.715156 -1.590528  
H 0 0.559985 2.633350 -0.412053  
H 0 -4.534660 -0.924070 -0.374760  
H 0 -2.098697 -2.340819 0.823123  
H 0 -3.401839 -3.116375 -0.082395  
H 0 -1.348264 -2.692932 -1.520598  
H 0 -2.778966 -1.872722 -2.141994  
H 0 -0.983222 1.427127 1.616926

H 0 2.469748 1.106923 0.474514  
H 0 1.475521 0.082796 1.500335  
H 0 3.015884 -0.859154 -0.987412  
H 0 2.008812 -1.891031 0.017946  
H 0 4.425321 -2.142705 0.639949  
H 0 3.522050 -1.449210 1.996314  
H 0 4.534660 -0.408593 0.983937  
H 0 -3.942779 -0.692795 2.277453  
Free Energy (PCM/B3LYP/6-31G\*) = -845.156190  
Number of imaginary frequencies = 0

### Isomer 3

B3LYP/6-31G\* geometry

O 0 0.680519 2.578202 1.148958  
C 0 1.098550 1.885105 -0.024369  
C 0 -0.777877 0.159252 -0.005088  
C 0 1.263464 -0.364185 1.134596  
O 0 0.225865 -0.827327 0.268979  
C 0 2.049169 0.766544 0.418486  
C 0 -0.139902 1.333690 -0.762214  
C 0 2.861123 0.185500 -0.723347  
C 0 3.756573 -1.002727 -0.388193  
C 0 2.902792 -2.105039 0.268962  
C 0 2.147932 -1.559944 1.487843  
O 0 -1.126650 2.372736 -0.840804  
C 0 -1.897288 -0.518923 -0.789999  
C 0 -2.641024 -1.600255 0.003983  
C 0 -3.752928 -2.271721 -0.808359  
O 0 4.413059 -1.466708 -1.547624  
O 0 2.816427 0.597109 -1.875216  
H 0 -0.139152 3.035915 0.881646  
H 0 1.630212 2.571854 -0.699851  
H 0 -1.172658 0.542752 0.949654  
H 0 0.815382 0.057250 2.044887  
H 0 2.764762 1.189845 1.138663  
H 0 0.152984 0.997982 -1.763844  
H 0 4.500937 -0.653525 0.347444  
H 0 2.195471 -2.484643 -0.476940  
H 0 3.557838 -2.935164 0.553791  
H 0 1.519400 -2.342862 1.925632  
H 0 2.857965 -1.246860 2.264186  
H 0 -0.875075 2.971782 -1.562594  
H 0 -2.599755 0.259120 -1.111724  
H 0 -1.465181 -0.955884 -1.701638  
H 0 -3.070013 -1.150066 0.910463  
H 0 -1.922596 -2.355584 0.344018  
H 0 -4.271044 -3.035915 -0.217712  
H 0 -3.349354 -2.759485 -1.704371  
H 0 -4.500937 -1.540031 -1.138207  
H 0 4.110746 -0.872812 -2.264186  
Free Energy (PCM/B3LYP/6-31G\*) = -845.157209  
Number of imaginary frequencies = 0

### Isomer 4

B3LYP/6-31G\* geometry

O 0 -1.033289 2.398468 -1.307525  
C 0 -1.309094 1.757030 -0.060467  
C 0 0.678280 0.161350 -0.028920  
C 0 -1.313521 -0.561530 -1.111925  
O 0 -0.259163 -0.914446 -0.219931  
C 0 -2.179451 0.540084 -0.434725  
C 0 0.007517 1.367136 0.661146  
C 0 -2.933217 -0.091788 0.713170  
C 0 -3.820196 -1.276493 0.366283  
C 0 -2.897977 -2.360779 -0.243207  
C 0 -2.119753 -1.816389 -1.447000  
O 0 -0.187026 1.185333 2.057615  
C 0 1.872110 -0.389809 0.744285  
C 0 2.643274 -1.482535 -0.005888  
C 0 3.832929 -2.022130 0.794523  
O 0 -4.508335 -1.744030 1.504244  
O 0 -2.806521 0.226783 1.893518  
H 0 -0.549321 3.218573 -1.118001  
H 0 -1.874618 2.426281 0.602631  
H 0 1.009262 0.504132 -1.023418  
H 0 -0.886770 -0.137164 -2.031415

|     |           |           |           |
|-----|-----------|-----------|-----------|
| H O | -2.926435 | 0.879630  | -1.165249 |
| H O | 0.697858  | 2.216484  | 0.564483  |
| H O | -4.550681 | -0.963839 | -0.394269 |
| H O | -2.206490 | -2.697580 | -0.537727 |
| H O | -3.515435 | -3.218573 | -0.528902 |
| H O | -1.433180 | -2.578958 | -1.830244 |
| H O | -2.811765 | -1.569770 | -2.262388 |
| H O | -1.070494 | 0.789797  | 2.187637  |
| H O | 2.545420  | 0.448778  | 0.970665  |
| H O | 1.514310  | -0.769403 | 1.708638  |
| H O | 2.998419  | -1.081877 | -0.966088 |
| H O | 1.957413  | -2.302732 | -0.248667 |
| H O | 4.367462  | -2.800914 | 0.238451  |
| H O | 3.504391  | -2.457651 | 1.746392  |
| H O | 4.550681  | -1.225125 | 1.026146  |
| H O | -4.108918 | -1.273962 | 2.262388  |

Free Energy (PCM/B3LYP/6-31G\*) = -845.154496  
Number of imaginary frequencies = 0

**Isomer 5**

B3LYP/6-31G\* geometry

|     |           |           |           |
|-----|-----------|-----------|-----------|
| O O | -1.426315 | 2.622491  | 0.471689  |
| C O | -0.913760 | 1.434452  | -0.121333 |
| C O | 1.179176  | 0.028274  | -0.247461 |
| C O | -0.932108 | -1.093326 | -0.155630 |
| O O | 0.425825  | -1.076661 | 0.272927  |
| C O | -1.656162 | 0.171514  | 0.340508  |
| C O | 0.563461  | 1.343074  | 0.259964  |
| C O | -3.116174 | 0.164065  | -0.061314 |
| C O | -3.714053 | -1.186071 | -0.430794 |
| C O | -3.133987 | -2.275985 | 0.482534  |
| C O | -1.589481 | -2.380346 | 0.369048  |
| O O | 1.283899  | 2.434571  | -0.300431 |
| C O | 2.631740  | -0.152719 | 0.183256  |
| C O | 3.303802  | -1.395421 | -0.414482 |
| C O | 4.758955  | -1.554139 | 0.037120  |
| O O | -5.121996 | -1.148355 | -0.358342 |
| O O | -3.812935 | 1.173592  | -0.078904 |
| H O | -2.381850 | 2.630273  | 0.275423  |
| H O | -0.976216 | 1.502730  | -1.220030 |
| H O | 1.117334  | 0.021968  | -1.349144 |
| H O | -0.949256 | -1.090069 | -1.258131 |
| H O | -1.647905 | 0.157490  | 1.442557  |
| H O | 0.631998  | 1.357520  | 1.360239  |
| H O | -3.387904 | -1.384384 | -1.470220 |
| H O | -3.432171 | -2.043503 | 1.511298  |
| H O | -3.603055 | -3.230494 | 0.226975  |
| H O | -1.165347 | -2.589882 | 1.356526  |
| H O | -1.304293 | -3.211190 | -0.283744 |
| H O | 0.767001  | 3.230494  | -0.087114 |
| H O | 3.183178  | 0.748330  | -0.110617 |
| H O | 2.663710  | -0.201576 | 1.280993  |
| H O | 3.264617  | -1.333384 | -1.511298 |
| H O | 2.729369  | -2.286512 | -0.134652 |
| H O | 5.217806  | -2.445626 | -0.405607 |
| H O | 4.826822  | -1.650924 | 1.127830  |
| H O | 5.362739  | -0.686392 | -0.256367 |
| H O | -5.362739 | -0.203289 | -0.411874 |

Free Energy (PCM/B3LYP/6-31G\*) = -845.152813  
Number of imaginary frequencies = 0

**Isomer 6**

B3LYP/6-31G\* geometry

|     |           |           |           |
|-----|-----------|-----------|-----------|
| O O | -1.853193 | 2.995577  | -0.097796 |
| C O | -1.261905 | 1.790110  | -0.578238 |
| C O | 0.897991  | 0.479462  | -0.471290 |
| C O | -1.163864 | -0.720794 | -0.463622 |
| O O | 0.164822  | -0.643769 | 0.036792  |
| C O | -1.948676 | 0.537476  | -0.020544 |
| C O | 0.205389  | 1.808750  | -0.129482 |
| C O | -3.422019 | 0.443433  | -0.366644 |
| C O | -4.109826 | -0.883734 | -0.016589 |
| C O | -3.273730 | -2.088348 | -0.452877 |
| C O | -1.819871 | -2.002350 | 0.038170  |
| O O | 0.270791  | 2.041120  | 1.274409  |
| C O | 2.322524  | 0.389304  | 0.072930  |

|     |           |           |           |
|-----|-----------|-----------|-----------|
| C O | 3.078206  | -0.865225 | -0.382869 |
| C O | 4.502846  | -0.931727 | 0.176543  |
| O O | -4.231380 | -0.931990 | 1.411660  |
| O O | -4.053785 | 1.387435  | -0.826688 |
| H O | -2.800664 | 2.918961  | -0.317981 |
| H O | -1.298815 | 1.760949  | -1.678354 |
| H O | 0.925506  | 0.411035  | -1.573284 |
| H O | -1.130007 | -0.742819 | -1.567804 |
| H O | -1.890501 | 0.567438  | 1.076724  |
| H O | 0.726128  | 2.614446  | -0.672351 |
| H O | -5.097085 | -0.895867 | -0.494645 |
| H O | -3.755525 | -2.995577 | -0.072756 |
| H O | -3.296876 | -2.146712 | -1.548931 |
| H O | -1.788625 | -2.016654 | 1.133497  |
| H O | -1.249009 | -2.866231 | -0.318904 |
| H O | -0.397225 | 2.729216  | 1.446838  |
| H O | 2.866734  | 1.286667  | -0.252096 |
| H O | 2.278177  | 0.427180  | 1.167772  |
| H O | 3.114031  | -0.887531 | -1.481464 |
| H O | 2.516362  | -1.754461 | -0.073914 |
| H O | 5.021038  | -1.836653 | -0.160960 |
| H O | 4.496934  | -0.939757 | 1.273592  |
| H O | 5.097085  | -0.067091 | -0.144752 |
| H O | -4.884094 | -0.263504 | 1.678354  |

Free Energy (PCM/B3LYP/6-31G\*) = -845.152988  
Number of imaginary frequencies = 0

**Isomer 7**

B3LYP/6-31G\* geometry

|     |           |           |           |
|-----|-----------|-----------|-----------|
| O O | -1.097277 | 2.153571  | -1.047327 |
| C O | -1.098544 | 1.622213  | 0.282275  |
| C O | 0.967430  | 0.183382  | -0.112830 |
| C O | -1.175113 | -0.823856 | -0.405075 |
| O O | 0.143891  | -0.976107 | 0.100871  |
| C O | -1.892717 | 0.314603  | 0.369904  |
| C O | 0.376427  | 1.393401  | 0.644775  |
| C O | -3.315105 | 0.422419  | -0.142420 |
| C O | -4.132696 | -0.867412 | -0.005227 |
| C O | -3.388306 | -1.996096 | -0.736064 |
| C O | -1.930193 | -2.143148 | -0.265477 |
| O O | 1.120698  | 2.578960  | 0.386425  |
| C O | 2.380290  | -0.160614 | 0.347330  |
| C O | 3.058414  | -1.251380 | -0.490999 |
| C O | 4.467311  | -1.590645 | 0.005593  |
| O O | -4.242354 | -1.241902 | 1.369461  |
| O O | -3.764961 | 1.423419  | -0.686241 |
| H O | -2.031996 | 2.346330  | -1.247978 |
| H O | -1.522898 | 2.364130  | 0.974161  |
| H O | 0.974429  | 0.422420  | -1.188928 |
| H O | -1.122622 | -0.537773 | -1.467935 |
| H O | -1.947005 | -0.010436 | 1.417290  |
| H O | 0.448407  | 1.195868  | 1.721189  |
| H O | -5.120300 | -0.700928 | -0.453144 |
| H O | -3.939118 | -2.928846 | -0.573619 |
| H O | -3.417854 | -1.786539 | -1.813009 |
| H O | -1.902774 | -2.459536 | 0.783415  |
| H O | -1.424117 | -2.916257 | -0.853872 |
| H O | 0.753593  | 2.928846  | -0.446395 |
| H O | 2.974391  | 0.760664  | 0.315497  |
| H O | 2.334359  | -0.474131 | 1.400396  |
| H O | 3.108366  | -0.921369 | -1.538429 |
| H O | 2.433914  | -2.152815 | -0.480783 |
| H O | 4.931120  | -2.368227 | -0.612166 |
| H O | 4.445205  | -1.955229 | 1.040132  |
| H O | 5.120300  | -0.709258 | -0.020442 |
| H O | -4.814141 | -0.594099 | 1.813009  |

Free Energy (PCM/B3LYP/6-31G\*) = -845.153563  
Number of imaginary frequencies = 0

**Isomer 8**

B3LYP/6-31G\* geometry

|     |           |           |           |
|-----|-----------|-----------|-----------|
| O O | -1.171750 | 2.374987  | -1.550432 |
| C O | -1.186516 | 1.984479  | -0.179794 |
| C O | 0.919350  | 0.607633  | -0.422695 |
| C O | -1.163092 | -0.541771 | -0.565405 |
| O O | 0.165062  | -0.563750 | -0.043017 |

|   |   |           |           |           |
|---|---|-----------|-----------|-----------|
| C | 0 | -1.942112 | 0.661786  | 0.035320  |
| C | 0 | 0.279076  | 1.820742  | 0.270239  |
| C | 0 | -3.347792 | 0.635103  | -0.528684 |
| C | 0 | -4.120203 | -0.654212 | -0.224567 |
| C | 0 | -3.311751 | -1.847168 | -0.759853 |
| C | 0 | -1.861007 | -1.859765 | -0.244744 |
| O | 0 | 0.342838  | 1.687290  | 1.690333  |
| C | 0 | 2.379066  | 0.374262  | -0.043329 |
| C | 0 | 3.032846  | -0.790487 | -0.797626 |
| C | 0 | 4.497780  | -1.001626 | -0.402622 |
| O | 0 | -4.261203 | -0.825721 | 1.187203  |
| O | 0 | -3.817187 | 1.525650  | -1.226465 |
| H | 0 | -2.111844 | 2.428580  | -1.806278 |
| H | 0 | -1.648397 | 2.767597  | 0.439291  |
| H | 0 | 0.836011  | 0.746384  | -1.510410 |
| H | 0 | -1.106588 | -0.408148 | -1.657245 |
| H | 0 | -2.030155 | 0.471970  | 1.113078  |
| H | 0 | 0.826110  | 2.732953  | 0.008341  |
| H | 0 | -5.098179 | -0.597153 | -0.718547 |
| H | 0 | -3.829612 | -2.767597 | -0.469644 |
| H | 0 | -3.320191 | -1.803145 | -1.856473 |
| H | 0 | -1.846906 | -2.016552 | 0.839799  |
| H | 0 | -1.308914 | -2.687041 | -0.703750 |
| H | 0 | 0.195304  | 0.743817  | 1.878714  |
| H | 0 | 2.929083  | 1.303235  | -0.247885 |
| H | 0 | 2.446623  | 0.205251  | 1.038748  |
| H | 0 | 2.967134  | -0.602966 | -1.878714 |
| H | 0 | 2.461278  | -1.706654 | -0.607693 |
| H | 0 | 4.941982  | -1.837697 | -0.954757 |
| H | 0 | 4.591163  | -1.221367 | 0.668165  |
| H | 0 | 5.098179  | -0.107187 | -0.610499 |
| H | 0 | -4.869301 | -0.142336 | 1.514087  |

Free Energy (PCM/B3LYP/6-31G\*) = -845.151598  
Number of imaginary frequencies = 0

**Isomer 9**

B3LYP/6-31G\* geometry

|   |   |           |           |           |
|---|---|-----------|-----------|-----------|
| O | 0 | 0.676500  | -0.108450 | -1.285749 |
| C | 0 | -1.274503 | 0.864750  | -0.202024 |
| C | 0 | 0.940930  | 2.055831  | -0.224520 |
| C | 0 | -0.386153 | 1.879337  | 0.541627  |
| C | 0 | 1.627519  | 0.723192  | -0.575862 |
| C | 0 | -0.491301 | -0.434583 | -0.533692 |
| C | 0 | -1.355134 | -1.400292 | -1.340283 |
| C | 0 | -2.642850 | -1.742315 | -0.574009 |
| C | 0 | -3.461866 | -0.483620 | -0.200449 |
| C | 0 | -2.546326 | 0.495322  | 0.521909  |
| O | 0 | -2.833815 | 0.882388  | 1.650772  |
| C | 0 | 2.337402  | 0.003242  | 0.577266  |
| C | 0 | 3.068986  | -1.268903 | 0.129295  |
| C | 0 | 3.823156  | -1.951093 | 1.274931  |
| O | 0 | -0.092605 | 1.463187  | 1.871308  |
| O | 0 | 0.684669  | 2.787533  | -1.428041 |
| O | 0 | -4.578385 | -0.809451 | 0.596695  |
| H | 0 | -1.571151 | 1.304882  | -1.165213 |
| H | 0 | 1.612408  | 2.672293  | 0.382124  |
| H | 0 | -0.890148 | 2.856132  | 0.550207  |
| H | 0 | 2.377590  | 0.952876  | -1.342026 |
| H | 0 | -0.201165 | -0.915601 | 0.410248  |
| H | 0 | -0.786767 | -2.314219 | -1.543524 |
| H | 0 | -1.592665 | -0.944013 | -2.310145 |
| H | 0 | -2.402375 | -2.272262 | 0.356550  |
| H | 0 | -3.280232 | -2.406252 | -1.166384 |
| H | 0 | -3.797596 | 0.005315  | -1.129628 |
| H | 0 | 3.063584  | 0.713159  | 0.997714  |
| H | 0 | 1.637300  | -0.222669 | 1.387140  |
| H | 0 | 3.773343  | -1.016383 | -0.676118 |
| H | 0 | 2.346417  | -1.970090 | -0.306435 |
| H | 0 | 4.336085  | -2.856132 | 0.929918  |
| H | 0 | 3.138966  | -2.241899 | 2.081646  |
| H | 0 | 4.578385  | -1.282548 | 1.706491  |
| H | 0 | -0.958488 | 1.374252  | 2.310145  |
| H | 0 | 0.439523  | 2.130794  | -2.102199 |
| H | 0 | -4.459056 | -0.310454 | 1.428964  |

Free Energy (PCM/B3LYP/6-31G\*) = -845.151615  
Number of imaginary frequencies = 0

**Isomer 10**

B3LYP/6-31G\* geometry

|   |   |           |           |           |
|---|---|-----------|-----------|-----------|
| O | 0 | 0.618004  | -0.623314 | -1.502989 |
| C | 0 | -1.247189 | 0.725712  | -0.736407 |
| C | 0 | 1.022995  | 1.754939  | -1.093098 |
| C | 0 | -0.300241 | 1.859505  | -0.321654 |
| C | 0 | 1.630445  | 0.324300  | -1.099053 |
| C | 0 | -0.534735 | -0.651096 | -0.671618 |
| C | 0 | -1.466875 | -1.765234 | -1.142235 |
| C | 0 | -2.749876 | -1.794222 | -0.296629 |
| C | 0 | -3.498804 | -0.440273 | -0.312241 |
| C | 0 | -2.521590 | 0.662593  | 0.071652  |
| O | 0 | -2.764156 | 1.391113  | 1.028838  |
| C | 0 | 2.369682  | -0.089830 | 0.180917  |
| C | 0 | 3.045992  | -1.461736 | 0.064901  |
| C | 0 | 3.821908  | -1.847943 | 1.328183  |
| O | 0 | 0.021859  | 1.813788  | 1.070565  |
| O | 0 | 1.946239  | 2.724649  | -0.613507 |
| O | 0 | -4.609631 | -0.451292 | 0.556239  |
| H | 0 | -1.531071 | 0.873832  | -1.788856 |
| H | 0 | 0.809975  | 2.014402  | -2.136618 |
| H | 0 | -0.760829 | 2.829259  | -0.558126 |
| H | 0 | 2.353354  | 0.288707  | -1.922632 |
| H | 0 | -0.244507 | -0.842874 | 0.370917  |
| H | 0 | -0.948905 | -2.727488 | -1.069272 |
| H | 0 | -1.706759 | -1.606144 | -2.201636 |
| H | 0 | -2.512195 | -2.033297 | 0.747833  |
| H | 0 | -3.432517 | -2.570587 | -0.656275 |
| H | 0 | -3.833938 | -0.237200 | -1.342719 |
| H | 0 | 3.130174  | 0.677256  | 0.373929  |
| H | 0 | 1.694235  | -0.072713 | 1.043148  |
| H | 0 | 3.728283  | -1.456630 | -0.797321 |
| H | 0 | 2.287344  | -2.224228 | -0.151055 |
| H | 0 | 4.297945  | -2.829259 | 1.218975  |
| H | 0 | 3.159611  | -1.893875 | 2.201636  |
| H | 0 | 4.609631  | -1.116791 | 1.548481  |
| H | 0 | -0.813821 | 1.982574  | 1.541896  |
| H | 0 | 1.828138  | 2.735307  | 0.353526  |
| H | 0 | -4.449907 | 0.273067  | 1.193205  |

Free Energy (PCM/B3LYP/6-31G\*) = -845.152899  
Number of imaginary frequencies = 0

**Isomer 11**

B3LYP/6-31G\* geometry

|   |   |           |           |           |
|---|---|-----------|-----------|-----------|
| O | 0 | -0.624843 | -0.546955 | 1.190414  |
| C | 0 | 1.377474  | 0.398033  | 0.206845  |
| C | 0 | -0.743567 | 1.712947  | 0.203232  |
| C | 0 | 0.548679  | 1.424909  | -0.573103 |
| C | 0 | -1.498390 | 0.426525  | 0.584914  |
| C | 0 | 0.528737  | -0.878913 | 0.428121  |
| C | 0 | 1.318053  | -1.959779 | 1.162053  |
| C | 0 | 2.598220  | -2.310065 | 0.388878  |
| C | 0 | 3.498633  | -1.076403 | 0.190858  |
| C | 0 | 2.708667  | 0.072120  | -0.425806 |
| O | 0 | 3.174737  | 0.690409  | -1.378239 |
| C | 0 | -2.324839 | -0.156746 | -0.573175 |
| C | 0 | -3.142285 | -1.390891 | -0.172038 |
| C | 0 | -3.988717 | -1.940874 | -1.324237 |
| O | 0 | 1.220426  | 2.674055  | -0.718169 |
| O | 0 | -0.425745 | 2.413147  | 1.405165  |
| O | 0 | 4.628164  | -1.384699 | -0.595338 |
| H | 0 | 1.587688  | 0.810645  | 1.204458  |
| H | 0 | -1.399503 | 2.332436  | -0.427522 |
| H | 0 | 0.299341  | 1.012766  | -1.561803 |
| H | 0 | -2.184735 | 0.695013  | 1.395858  |
| H | 0 | 0.229949  | -1.273672 | -0.556330 |
| H | 0 | 0.691053  | -2.850228 | 1.276937  |
| H | 0 | 1.562013  | -1.602106 | 2.170872  |
| H | 0 | 2.349531  | -2.717007 | -0.599577 |
| H | 0 | 3.170489  | -3.078895 | 0.917604  |
| H | 0 | 3.812857  | -0.717911 | 1.188433  |
| H | 0 | -3.002791 | 0.632247  | -0.925981 |
| H | 0 | -1.681014 | -0.405190 | -1.427548 |
| H | 0 | -3.795508 | -1.128969 | 0.672344  |
| H | 0 | -2.464570 | -2.170487 | 0.195925  |

H O -4.564786 -2.818524 -1.009505  
H O -3.359064 -2.241522 -2.170872  
H O -4.698685 -1.188860 -1.690232  
H O 2.066514 2.468967 -1.155823  
H O 0.236853 3.078895 1.146332  
H O 4.698685 -0.658952 -1.246349  
Free Energy (PCM/B3LYP/6-31G\*) = -845.154932  
Number of imaginary frequencies = 0

#### Isomer 12

B3LYP/6-31G\* geometry  
O O 0.609529 -0.899411 -1.417453  
C O -1.296609 0.310779 -0.522265  
C O 0.902856 1.437428 -0.797923  
C O -0.362427 1.373773 0.058066  
C O 1.579254 0.055708 -0.938361  
C O -0.547744 -1.044447 -0.600606  
C O -1.441243 -2.139168 -1.176759  
C O -2.711678 -2.295399 -0.324763  
C O -3.507962 -0.978523 -0.224537  
C O -2.596934 0.154933 0.231395  
O O -2.931826 0.876356 1.164230  
C O 2.333429 -0.418563 0.311673  
C O 3.046809 -1.761219 0.107714  
C O 3.842882 -2.201835 1.340097  
O O -0.928419 2.683203 0.044586  
O O 1.834428 2.366797 -0.261003  
O O -4.612771 -1.110227 0.642279  
H O -1.556968 0.589509 -1.554877  
H O 0.589746 1.756949 -1.805550  
H O -0.092705 1.098491 1.087952  
H O 2.301972 0.121482 -1.759366  
H O -0.251816 -1.337872 0.418466  
H O -0.887623 -3.083673 -1.201800  
H O -1.698315 -1.885981 -2.213435  
H O -2.450228 -2.613353 0.692550  
H O -3.364939 -3.066721 -0.744611  
H O -3.850708 -0.704414 -1.238491  
H O 3.064613 0.358934 0.561047  
H O 1.661098 -0.486818 1.176980  
H O 3.722067 -1.681935 -0.756233  
H O 2.309235 -2.530581 -0.151535  
H O 4.343553 -3.161456 1.167476  
H O 3.189292 -2.319154 2.213435  
H O 4.612771 -1.464596 1.599220  
H O -1.660237 2.664384 0.685392  
H O 1.312955 3.161456 -0.051727  
H O -4.560281 -0.345422 1.249030  
Free Energy (PCM/B3LYP/6-31G\*) = -845.153345  
Number of imaginary frequencies = 0

#### Isomer 13

B3LYP/6-31G\* geometry  
O O -0.831171 2.568096 -0.193725  
C O -0.473944 1.231281 -0.542505  
C O 1.404939 -0.358825 -1.034067  
C O -0.604341 -1.249563 0.011862  
O O 0.816478 -1.296285 -0.119552  
C O -1.081436 0.179265 0.410801  
C O 1.047705 1.066564 -0.591694  
C O -2.595352 0.262152 0.448875  
C O -3.368009 -0.334716 -0.724124  
C O -2.872993 -1.771612 -0.978091  
C O -1.355460 -1.807681 -1.209007  
O O 1.608392 1.989322 -1.514495  
C O 2.908631 -0.642012 -1.131553  
C O 3.792134 -0.297528 0.080696  
C O 3.573049 -1.159876 1.329688  
O O -4.753249 -0.296101 -0.464442  
O O -3.208219 0.747633 1.388660  
H O -0.587536 2.714419 0.736996  
H O -0.858842 1.106387 -1.559990  
H O 0.981240 -0.507460 -2.039102  
H O -0.809382 -1.913440 0.858869  
H O -0.721621 0.398858 1.423805  
H O 1.446383 1.239058 0.421826

H O -3.139390 0.274005 -1.616063  
H O -3.145404 -2.389356 -0.112267  
H O -3.405385 -2.177920 -1.843989  
H O -1.022156 -2.837110 -1.377177  
H O -1.108989 -1.243694 -2.116150  
H O 1.162647 2.837110 -1.338631  
H O 3.021622 -1.705410 -1.381381  
H O 3.273258 -0.078510 -1.998455  
H O 3.669395 0.763493 0.334625  
H O 4.836851 -0.403252 -0.241222  
H O 2.562341 -1.042088 1.729632  
H O 4.288477 -0.891449 2.116150  
H O 3.712996 -2.223585 1.099898  
H O -4.836851 0.179756 0.386864  
Free Energy (PCM/B3LYP/6-31G\*) = -845.146401  
Number of imaginary frequencies = 0

#### Isomer 14

B3LYP/6-31G\* geometry  
O O 0.246950 1.395859 1.866370  
C O -0.550244 1.413310 0.682914  
C O 0.976575 -0.029553 -0.818958  
C O -0.759982 -1.105344 0.488385  
O O -0.061249 -1.026493 -0.760468  
C O -1.514960 0.225127 0.739745  
C O 0.343237 1.357014 -0.569878  
C O -2.674400 0.358618 -0.240467  
C O -3.631749 -0.839121 -0.284028  
C O -2.838055 -2.112255 -0.591713  
C O -1.696984 -2.311924 0.415453  
O O 1.400850 2.317759 -0.443891  
C O 2.197281 -0.373908 0.047701  
C O 2.831961 -1.720660 -0.322628  
C O 4.076860 -2.035544 0.512739  
O O -4.254041 -1.013791 0.993855  
O O -2.847229 1.334701 -0.953226  
H O 1.023526 1.943810 1.647396  
H O -1.130997 2.347321 0.640896  
H O 1.300145 -0.055910 -1.866370  
H O -0.045645 -1.251412 1.307049  
H O -1.956047 0.175245 1.744740  
H O -0.283943 1.593047 -1.436976  
H O -4.380078 -0.643689 -1.062765  
H O -3.525015 -2.966018 -0.576058  
H O -2.433609 -2.033675 -1.607254  
H O -2.112071 -2.485049 1.414281  
H O -1.107851 -3.196637 0.149946  
H O 1.022774 3.196637 -0.612395  
H O 2.930944 0.428627 -0.094836  
H O 1.934345 -0.358932 1.110994  
H O 3.098223 -1.713477 -1.389509  
H O 2.091425 -2.520558 -0.198876  
H O 3.835024 -2.080537 1.581909  
H O 4.848115 -1.266537 0.380453  
H O 4.514092 -2.999786 0.228913  
H O -4.848115 -0.259969 1.142356  
Free Energy (PCM/B3LYP/6-31G\*) = -845.144572  
Number of imaginary frequencies = 0

#### Isomer 15

B3LYP/6-31G\* geometry  
O O 0.727033 0.904948 1.404434  
C O 0.518483 1.250777 0.039373  
C O -1.621366 -0.087523 -0.222673  
C O 0.452652 -1.128693 -0.955191  
O O -0.941869 -0.916169 -1.174573  
C O 1.207393 0.226314 -0.889500  
C O -0.996578 1.313390 -0.240975  
C O 2.671929 0.039594 -0.523980  
C O 3.026445 -0.976320 0.556675  
C O 2.277299 -2.299055 0.323157  
C O 0.762924 -2.066109 0.221184  
O O -1.616662 2.073857 0.804013  
C O -3.100226 -0.083893 -0.608080  
C O -3.791554 -1.453404 -0.502671  
C O -3.919052 -1.989691 0.928434



O 0 4.425294 -1.174328 0.598043  
O 0 3.565983 0.668645 -1.074355  
H 0 0.027876 1.384958 1.889260  
H 0 0.959289 2.240429 -0.162343  
H 0 -1.499956 -0.494466 0.789989  
H 0 0.780643 -1.635260 -1.871029  
H 0 1.194164 0.675331 -1.889260  
H 0 -1.173635 1.774601 -1.221382  
H 0 2.668845 -0.540399 1.503757  
H 0 2.659720 -2.759570 -0.597619  
H 0 2.510345 -2.983896 1.145179  
H 0 0.243816 -3.016485 0.054440  
H 0 0.392383 -1.642959 1.159767  
H 0 -1.468526 3.016485 0.622457  
H 0 -3.612561 0.643438 0.032697  
H 0 -3.178138 0.285852 -1.639651  
H 0 -3.248903 -2.177674 -1.122119  
H 0 -4.794497 -1.363037 -0.939876  
H 0 -4.466141 -2.939369 0.942117  
H 0 -4.461073 -1.282885 1.569314  
H 0 -2.940145 -2.170060 1.387684  
H 0 4.794497 -0.472940 0.024515  
Free Energy (PCM/B3LYP/6-31G\*) = -845.149673  
Number of imaginary frequencies = 0

**Isomer 16**

B3LYP/6-31G\* geometry  
O 0 1.335207 1.089921 1.490433  
C 0 1.012787 1.704569 0.242389  
C 0 -1.132740 0.419274 -0.023363  
C 0 0.822388 -0.459001 -1.173191  
O 0 -0.591045 -0.214701 -1.199591  
C 0 1.607499 0.856862 -0.908899  
C 0 -0.518101 1.821256 0.064889  
C 0 3.093166 0.605423 -0.703722  
C 0 3.525368 -0.619121 0.095683  
C 0 2.739620 -1.863523 -0.345721  
C 0 1.226604 -1.617987 -0.250873  
O 0 -0.826615 2.594909 -1.092046  
C 0 -2.653571 0.414466 -0.156969  
C 0 -3.264730 -0.992069 -0.190058  
C 0 -4.791335 -0.969464 -0.315086  
O 0 4.919053 -0.815790 -0.030143  
O 0 3.945687 1.353931 -1.162578  
H 0 1.075901 1.698720 2.201389  
H 0 1.454833 2.708176 0.184703  
H 0 -0.844166 -0.141526 0.874349  
H 0 1.046130 -0.766642 -2.201389  
H 0 1.529077 1.489029 -1.799781  
H 0 -0.930850 2.360351 0.926443  
H 0 3.257605 -0.395457 1.141768  
H 0 3.027227 -2.115341 -1.375332  
H 0 3.034512 -2.708176 0.285569  
H 0 0.676298 -2.514195 -0.557344  
H 0 0.956936 -1.402143 0.787662  
H 0 -0.816859 1.970025 -1.839090  
H 0 -3.064507 0.976580 0.693148  
H 0 -2.935646 0.967082 -1.062200  
H 0 -2.978770 -1.531766 0.723905  
H 0 -2.831979 -1.551569 -1.027668  
H 0 -5.203531 -1.984768 -0.336102  
H 0 -5.105412 -0.462552 -1.235990  
H 0 -5.251445 -0.439251 0.528058  
H 0 5.251445 0.005595 -0.444783  
Free Energy (PCM/B3LYP/6-31G\*) = -845.149026  
Number of imaginary frequencies = 0

**Isomer 17**

B3LYP/6-31G\* geometry  
O 0 2.248090 2.832816 0.009273  
C 0 1.524868 1.705365 0.490926  
C 0 -0.482931 0.218814 0.150367  
C 0 1.484736 -0.710251 1.182188  
O 0 0.396181 -0.910270 0.267472  
C 0 2.376993 0.429950 0.654946  
C 0 0.306980 1.418726 -0.396245

C 0 3.085043 0.024188 -0.630017  
C 0 3.160105 -1.457086 -0.965346  
C 0 3.385504 -2.256021 0.323200  
C 0 2.229290 -2.050428 1.329323  
O 0 -0.538546 2.559766 -0.433073  
C 0 -1.650719 -0.185231 -0.744236  
C 0 -2.528699 -1.298057 -0.157518  
C 0 -3.692236 -1.678338 -1.078619  
O 0 4.176396 -1.704766 -1.913166  
O 0 3.615842 0.842897 -1.376788  
H 0 2.814720 2.503451 -0.716554  
H 0 1.151119 1.994069 1.481117  
H 0 -0.859039 0.486047 1.152870  
H 0 1.070734 -0.410849 2.156359  
H 0 3.176326 0.639753 1.381711  
H 0 0.657021 1.169332 -1.412856  
H 0 2.168517 -1.719455 -1.373580  
H 0 3.491272 -3.315090 0.069149  
H 0 4.341374 -1.939036 0.757327  
H 0 1.477406 -2.838784 1.221388  
H 0 2.621675 -2.125242 2.348318  
H 0 0.061705 3.315090 -0.567601  
H 0 -2.256073 0.710999 -0.926312  
H 0 -1.247897 -0.499580 -1.717564  
H 0 -2.922873 -0.970804 0.815024  
H 0 -1.908944 -2.180579 0.040931  
H 0 -4.305791 -2.471888 -0.637018  
H 0 -3.328029 -2.038767 -2.048659  
H 0 -4.345138 -0.817497 -1.269143  
H 0 4.345138 -0.847043 -2.348318  
Free Energy (PCM/B3LYP/6-31G\*) = -845.153429  
Number of imaginary frequencies = 0

**Isomer 18**

B3LYP/6-31G\* geometry  
O 0 2.662521 3.097897 0.168556  
C 0 1.802187 2.076742 0.666701  
C 0 -0.348468 0.819870 0.230190  
C 0 1.481986 -0.380796 1.205333  
O 0 0.387274 -0.408138 0.284395  
C 0 2.499245 0.696534 0.779894  
C 0 0.552480 1.974417 -0.222863  
C 0 3.235729 0.304002 -0.489634  
C 0 3.015388 -1.088355 -1.046791  
C 0 3.110993 -2.089092 0.120446  
C 0 2.086703 -1.793474 1.245886  
O 0 0.943413 1.763787 -1.577138  
C 0 -1.560568 0.600884 -0.673961  
C 0 -2.539468 -0.454746 -0.145598  
C 0 -3.749555 -0.649857 -1.064571  
O 0 3.959916 -1.379039 -2.055286  
O 0 4.067429 1.046497 -1.012000  
H 0 3.409300 2.656592 -0.284219  
H 0 1.487010 2.371454 1.676202  
H 0 -0.695619 1.065619 1.249348  
H 0 1.094933 -0.121403 2.203029  
H 0 3.278324 0.782257 1.551224  
H 0 -0.014575 2.913796 -0.130948  
H 0 1.994649 -1.107652 -1.454831  
H 0 2.969442 -3.097897 -0.278893  
H 0 4.135420 -2.046172 0.508565  
H 0 1.247201 -2.494258 1.201721  
H 0 2.566432 -1.936682 2.219422  
H 0 1.571333 2.480455 -1.776555  
H 0 -2.078390 1.563781 -0.782375  
H 0 -1.204750 0.321316 -1.672648  
H 0 -2.883167 -0.160830 0.856448  
H 0 -2.009140 -1.406452 -0.023705  
H 0 -4.432404 -1.409632 -0.667431  
H 0 -3.438311 -0.971784 -2.066107  
H 0 -4.316903 0.282381 -1.178258  
H 0 4.432404 -0.539463 -2.219422  
Free Energy (PCM/B3LYP/6-31G\*) = -845.153135  
Number of imaginary frequencies = 0

**Isomer 19**

B3LYP/6-31G\* geometry  
O 0 -0.510417 2.471863 -1.370480  
C 0 -0.869321 1.863395 -0.117327  
C 0 1.081615 0.231653 -0.187166  
C 0 -1.032688 -0.493240 -1.040525  
O 0 0.115572 -0.828931 -0.258434  
C 0 -1.799351 0.661480 -0.344877  
C 0 0.462856 1.449331 0.529543  
C 0 -2.442718 0.154757 0.940381  
C 0 -3.321080 -1.092794 0.778619  
C 0 -2.503220 -2.212513 0.128308  
C 0 -1.882470 -1.753499 -1.199326  
O 0 1.355908 2.557707 0.534373  
C 0 2.316203 -0.305014 0.529969  
C 0 3.045416 -1.416205 -0.234715  
C 0 4.278331 -1.938217 0.509795  
O 0 -4.422467 -0.799331 -0.088829  
O 0 -2.284920 0.686997 2.027521  
H 0 -1.221084 3.078454 -1.630002  
H 0 -1.356461 2.602402 0.528568  
H 0 1.352637 0.534121 -1.212795  
H 0 -0.703632 -0.136959 -2.027521  
H 0 -2.623820 0.964063 -1.005888  
H 0 0.271644 1.181198 1.573380  
H 0 -3.672979 -1.390037 1.774836  
H 0 -1.714487 -2.516668 0.825891  
H 0 -3.156659 -3.078454 -0.026966  
H 0 -1.255512 -2.548275 -1.618283  
H 0 -2.675162 -1.546231 -1.926422  
H 0 1.209642 2.991410 -0.327239  
H 0 2.993864 0.540314 0.700428  
H 0 2.010022 -0.672144 1.520360  
H 0 3.346494 -1.036232 -1.221404  
H 0 2.347513 -2.241220 -0.421587  
H 0 4.782908 -2.728054 -0.058551  
H 0 4.004003 -2.353984 1.487348  
H 0 5.005839 -1.135617 0.684600  
H 0 -5.005839 -0.173813 0.371261  
Free Energy (PCM/B3LYP/6-31G\*) = -845.151295  
Number of imaginary frequencies = 0

**Isomer 20**  
B3LYP/6-31G\* geometry  
O 0 -0.937302 2.304901 -1.709883  
C 0 -1.032193 1.872555 -0.349883  
C 0 1.015300 0.353431 -0.299521  
C 0 -1.057181 -0.590610 -0.989079  
O 0 0.111910 -0.761405 -0.188937  
C 0 -1.884901 0.591997 -0.403926  
C 0 0.378307 1.645923 0.254583  
C 0 -2.459332 0.132462 0.919170  
C 0 -3.373218 -1.090180 0.826466  
C 0 -2.496048 -2.250373 0.325740  
C 0 -1.838300 -1.905174 -1.018760  
O 0 0.358663 1.705126 1.674296  
C 0 2.315399 -0.027937 0.400896  
C 0 3.041736 -1.213899 -0.246178  
C 0 4.341604 -1.578935 0.477721  
O 0 -4.426761 -0.903977 -0.116735  
O 0 -2.160081 0.603341 2.011440  
H 0 -0.450950 3.145203 -1.718816  
H 0 -1.541823 2.631078 0.261375  
H 0 1.211342 0.527204 -1.371079  
H 0 -0.758324 -0.318546 -2.011440  
H 0 -2.731923 0.771870 -1.077065  
H 0 1.013482 2.481559 -0.071435  
H 0 -3.764463 -1.301708 1.829362  
H 0 -1.730939 -2.458397 1.082340  
H 0 -3.121723 -3.145203 0.234827  
H 0 -1.155666 -2.706622 -1.321817  
H 0 -2.608424 -1.824820 -1.793279  
H 0 -0.482061 1.302098 1.972555  
H 0 2.972200 0.853232 0.400195  
H 0 2.090196 -0.246256 1.451463  
H 0 3.262017 -0.974859 -1.296460  
H 0 2.370264 -2.080588 -0.261513

H 0 4.840940 -2.427884 -0.003460  
H 0 4.149404 -1.853364 1.522435  
H 0 5.044422 -0.736345 0.481075  
H 0 -5.044422 -0.248626 0.246569  
Free Energy (PCM/B3LYP/6-31G\*) = -845.149134  
Number of imaginary frequencies = 0

**Isomer 21**  
B3LYP/6-31G\* geometry  
O 0 -1.096902 2.660432 0.413141  
C 0 -0.559149 1.454562 -0.125279  
C 0 1.572022 0.089747 -0.184136  
C 0 -0.529005 -1.052529 -0.159617  
O 0 0.812915 -1.026263 0.308956  
C 0 -1.275399 0.198376 0.371958  
C 0 0.913344 1.403527 0.280375  
C 0 -2.740763 0.142993 0.006792  
C 0 -3.470350 -1.151983 0.343189  
C 0 -2.674465 -2.363376 -0.183546  
C 0 -1.211117 -2.341853 0.286775  
O 0 1.618513 2.496112 -0.297241  
C 0 3.012384 -0.039125 0.310632  
C 0 3.870215 -1.112444 -0.382153  
C 0 3.516558 -2.565387 -0.042531  
O 0 -4.782278 -1.134614 -0.174197  
O 0 -3.341078 1.064582 -0.534590  
H 0 -1.990901 2.743738 0.037771  
H 0 -0.609671 1.482767 -1.224835  
H 0 1.557216 0.076749 -1.287215  
H 0 -0.525245 -1.013212 -1.262532  
H 0 -1.217964 0.157996 1.470194  
H 0 0.965196 1.449761 1.381146  
H 0 -3.496578 -1.209320 1.446277  
H 0 -3.172588 -3.279138 0.149880  
H 0 -2.722263 -2.351520 -1.279884  
H 0 -1.155971 -2.418093 1.380456  
H 0 -0.671157 -3.200570 -0.125780  
H 0 1.065104 3.279138 -0.131305  
H 0 3.484685 0.938434 0.160839  
H 0 2.987639 -0.214939 1.395263  
H 0 4.918014 -0.931283 -0.107533  
H 0 3.814962 -0.964559 -1.470194  
H 0 4.211587 -3.257911 -0.532177  
H 0 2.500896 -2.817016 -0.359044  
H 0 3.578164 -2.740382 1.038997  
H 0 -4.918014 -0.226161 -0.508989  
Free Energy (PCM/B3LYP/6-31G\*) = -845.156763  
Number of imaginary frequencies = 0

**Isomer 22**  
B3LYP/6-31G\* geometry  
O 0 -1.529197 2.976096 -0.031753  
C 0 -0.991503 1.731596 -0.471434  
C 0 1.152656 0.387713 -0.424136  
C 0 -0.919484 -0.768973 -0.209777  
O 0 0.437084 -0.688730 0.200606  
C 0 -1.653446 0.529267 0.213719  
C 0 0.503427 1.748817 -0.122763  
C 0 -3.140815 0.428431 -0.024562  
C 0 -3.829310 -0.843231 0.457405  
C 0 -3.049660 -2.089215 -0.001603  
C 0 -1.567898 -2.009944 0.396041  
O 0 0.668497 2.064824 1.256063  
C 0 2.608227 0.304671 0.030737  
C 0 3.312539 -0.990952 -0.391481  
C 0 4.772936 -1.045414 0.067876  
O 0 -5.168407 -0.883887 0.016438  
O 0 -3.801382 1.313790 -0.559644  
H 0 -2.486450 2.927629 -0.206951  
H 0 -1.103377 1.631341 -1.561621  
H 0 1.105206 0.249444 -1.518561  
H 0 -0.959046 -0.848174 -1.310605  
H 0 -1.507785 0.628414 1.299522  
H 0 0.997701 2.508675 -0.749332  
H 0 -3.791238 -0.801732 1.561621  
H 0 -3.519812 -2.976096 0.434825

H O -3.148874 -2.175113 -1.091181  
H O -1.463270 -1.972846 1.488150  
H O -1.035526 -2.902004 0.049633  
H O 0.043054 2.791641 1.427716  
H O 3.142847 1.168599 -0.387288  
H O 2.637935 0.413615 1.121247  
H O 3.268423 -1.087176 -1.485784  
H O 2.763244 -1.847592 0.016210  
H O 5.252903 -1.980301 -0.243357  
H O 4.846989 -0.979669 1.160502  
H O 5.353528 -0.215323 -0.353642  
H O -5.353528 0.008110 -0.337858  
Free Energy (PCM/B3LYP/6-31G\*) = -845.158207  
Number of imaginary frequencies = 0

### Isomer 23

B3LYP/6-31G\* geometry  
O O 1.021685 2.108023 1.086003  
C O 0.922412 1.680765 -0.276678  
C O -1.141794 0.246955 0.155559  
C O 0.994838 -0.808821 0.230732  
O O -0.355427 -0.905845 -0.195086  
C O 1.678968 0.368249 -0.516143  
C O -0.578699 1.500326 -0.552048  
C O 3.137158 0.419514 -0.125584  
C O 3.930169 -0.860310 -0.352219  
C O 3.198767 -2.025082 0.357194  
C O 1.718721 -2.123543 -0.046112  
O O -1.279658 2.674721 -0.160442  
C O -2.587736 -0.043224 -0.232996  
C O -3.226149 -1.190066 0.560580  
C O -4.673405 -1.466804 0.141431  
O O 5.254097 -0.718682 0.112170  
O O 3.670934 1.384949 0.411533  
H O 1.959021 2.329127 1.229655  
H O 1.313597 2.465553 -0.938869  
H O -1.073814 0.406489 1.244011  
H O 1.020885 -0.593609 1.310679  
H O 1.632164 0.121143 -1.586973  
H O -0.725617 1.382431 -1.632376  
H O 3.935318 -1.057878 -1.436572  
H O 3.725282 -2.956078 0.124812  
H O 3.287845 -1.866262 1.439512  
H O 1.624679 -2.364642 -1.113007  
H O 1.232098 -2.931178 0.511060  
H O -0.854733 2.956078 0.670803  
H O -3.162022 0.879563 -0.087479  
H O -2.618419 -0.271486 -1.308245  
H O -3.194648 -0.947868 1.632376  
H O -2.622686 -2.096446 0.430957  
H O -5.106660 -2.287916 0.723980  
H O -4.732763 -1.742295 -0.918858  
H O -5.305405 -0.582238 0.289241  
H O 5.305405 0.185742 0.480043  
Free Energy (PCM/B3LYP/6-31G\*) = -845.159232  
Number of imaginary frequencies = 0

### Isomer 24

B3LYP/6-31G\* geometry  
O O 1.056365 -2.196153 -1.561823  
C O 0.960363 -1.953361 -0.161532  
C O -1.127495 -0.548712 -0.425560  
C O 0.955985 0.597127 -0.299166  
O O -0.405186 0.575551 0.123908  
C O 1.688436 -0.659556 0.249053  
C O -0.537296 -1.829159 0.186480  
C O 3.136419 -0.592699 -0.171655  
C O 3.891399 0.660677 0.249875  
C O 3.107969 1.899891 -0.246046  
C O 1.631882 1.876405 0.183729  
O O -0.709409 -1.842367 1.603516  
C O -2.611290 -0.346255 -0.131566  
C O -3.210600 0.891246 -0.811853  
C O -4.699794 1.072080 -0.501637  
O O 5.209023 0.646023 -0.252194  
O O 3.690462 -1.435952 -0.870288

H O 2.009990 -2.272720 -1.746962  
H O 1.374901 -2.797719 0.407260  
H O -0.964379 -0.577156 -1.512596  
H O 0.982489 0.559384 -1.399228  
H O 1.668558 -0.580814 1.345763  
H O -1.058277 -2.707285 -0.209832  
H O 3.913127 0.677183 1.351713  
H O 3.606178 2.797719 0.132783  
H O 3.183673 1.926712 -1.340478  
H O 1.547600 1.936574 1.276649  
H O 1.107772 2.744469 -0.230076  
H O -0.595795 -0.921963 1.898793  
H O -3.143474 -1.247265 -0.466340  
H O -2.757515 -0.284480 0.954148  
H O -3.068932 0.810120 -1.898793  
H O -2.654650 1.780804 -0.493000  
H O -5.104461 1.960281 -1.000128  
H O -4.868303 1.188311 0.576173  
H O -5.283624 0.205680 -0.836503  
H O 5.283624 -0.183981 -0.763559  
Free Energy (PCM/B3LYP/6-31G\*) = -845.156619  
Number of imaginary frequencies = 0

### Isomer 25

B3LYP/6-31G\* geometry  
O O 0.442401 -0.259354 -1.349633  
C O -1.425209 0.677678 -0.093879  
C O 0.677046 2.000951 -0.503817  
C O -0.527798 1.807147 0.439780  
C O 1.409558 0.687101 -0.835484  
C O -0.599141 -0.593417 -0.430459  
C O -1.482208 -1.671478 -1.053825  
C O -2.658798 -2.019688 -0.124934  
C O -3.494454 -0.787889 0.256184  
C O -2.556748 0.279980 0.831364  
O O -2.691800 0.717531 1.967682  
C O 2.305451 0.116061 0.271336  
C O 3.031749 -1.168750 -0.147323  
C O 3.978148 -1.692504 0.937677  
O O -0.040718 1.535845 1.750714  
O O 0.222419 2.607604 -1.718425  
O O -4.122411 -0.306040 -0.933933  
H O -1.889065 1.005101 -1.033724  
H O 1.372181 2.709186 -0.040812  
H O -1.098724 2.747306 0.434126  
H O 2.041569 0.895015 -1.707242  
H O -0.158405 -0.979161 0.499350  
H O -0.882210 -2.567145 -1.248059  
H O -1.856384 -1.311330 -2.018913  
H O -2.285793 -2.481375 0.798273  
H O -3.322761 -2.747306 -0.603944  
H O -4.236943 -1.044706 1.021821  
H O 3.045383 0.891987 0.513660  
H O 1.733069 -0.049035 1.189038  
H O 3.598651 -0.981092 -1.070385  
H O 2.292050 -1.939838 -0.395642  
H O 4.480446 -2.612437 0.617132  
H O 3.434284 -1.914557 1.864206  
H O 4.753365 -0.954364 1.177822  
H O -0.842111 1.394958 2.289840  
H O -0.079958 1.880961 -2.289840  
H O -4.753365 0.387931 -0.681312  
Free Energy (PCM/B3LYP/6-31G\*) = -845.146263  
Number of imaginary frequencies = 0

### Isomer 26

B3LYP/6-31G\* geometry  
O O 0.406090 -0.679282 -1.341369  
C O -1.376930 0.673870 -0.395103  
C O 0.812517 1.717610 -1.078326  
C O -0.406753 1.835736 -0.154147  
C O 1.441355 0.296680 -1.098777  
C O -0.639277 -0.690871 -0.375132  
C O -1.599325 -1.834499 -0.696017  
C O -2.787004 -1.843675 0.282420  
C O -3.537232 -0.503290 0.314082

|     |           |           |           |
|-----|-----------|-----------|-----------|
| C 0 | -2.528940 | 0.618639  | 0.588291  |
| O 0 | -2.628720 | 1.361533  | 1.556979  |
| C 0 | 2.332679  | -0.053364 | 0.101416  |
| C 0 | 3.002255  | -1.427245 | -0.029896 |
| C 0 | 3.915490  | -1.757143 | 1.154950  |
| O 0 | 0.086660  | 1.862812  | 1.188127  |
| O 0 | 1.770242  | 2.719684  | -0.756550 |
| O 0 | -4.143089 | -0.316005 | -0.967060 |
| H 0 | -1.813240 | 0.772467  | -1.398193 |
| H 0 | 0.468510  | 1.928217  | -2.097706 |
| H 0 | -0.913007 | 2.787371  | -0.374161 |
| H 0 | 2.063595  | 0.235650  | -1.999770 |
| H 0 | -0.220005 | -0.844802 | 0.629417  |
| H 0 | -1.061917 | -2.787371 | -0.639165 |
| H 0 | -1.957180 | -1.720963 | -1.725571 |
| H 0 | -2.435172 | -2.064809 | 1.298352  |
| H 0 | -3.501796 | -2.628011 | 0.010927  |
| H 0 | -4.287915 | -0.497543 | 1.114146  |
| H 0 | 3.104335  | 0.724200  | 0.167263  |
| H 0 | 1.763606  | 0.002647  | 1.035700  |
| H 0 | 3.584290  | -1.459011 | -0.962260 |
| H 0 | 2.229500  | -2.199939 | -0.126980 |
| H 0 | 4.380691  | -2.742737 | 1.037393  |
| H 0 | 3.354329  | -1.763639 | 2.097706  |
| H 0 | 4.720009  | -1.017754 | 1.254512  |
| H 0 | -0.701680 | 1.991557  | 1.748172  |
| H 0 | 1.771129  | 2.768414  | 0.216519  |
| H 0 | -4.720009 | 0.463780  | -0.915625 |

Free Energy (PCM/B3LYP/6-31G\*) = -845.147626  
Number of imaginary frequencies = 0

**Isomer 27**

B3LYP/6-31G\* geometry

|     |           |           |           |
|-----|-----------|-----------|-----------|
| O 0 | 0.456328  | -0.420609 | -1.255437 |
| C 0 | -1.492962 | 0.479519  | -0.129579 |
| C 0 | 0.528756  | 1.912806  | -0.455436 |
| C 0 | -0.656343 | 1.614022  | 0.472256  |
| C 0 | 1.321653  | 0.645274  | -0.820703 |
| C 0 | -0.590765 | -0.757465 | -0.350042 |
| C 0 | -1.374953 | -1.936290 | -0.917965 |
| C 0 | -2.546091 | -2.295890 | 0.010029  |
| C 0 | -3.494229 | -1.116513 | 0.234759  |
| C 0 | -2.734938 | 0.143486  | 0.672416  |
| O 0 | -3.157909 | 0.864482  | 1.568707  |
| C 0 | 2.298763  | 0.203833  | 0.281549  |
| C 0 | 3.137635  | -1.019210 | -0.108604 |
| C 0 | 4.126082  | -1.434028 | 0.985611  |
| O 0 | -1.391650 | 2.830488  | 0.592935  |
| O 0 | 0.044401  | 2.498446  | -1.663107 |
| O 0 | -4.122677 | -0.819062 | -1.019334 |
| H 0 | -1.840464 | 0.793110  | -1.124062 |
| H 0 | 1.204382  | 2.616638  | 0.055101  |
| H 0 | -0.281073 | 1.302004  | 1.458392  |
| H 0 | 1.903049  | 0.886621  | -1.717972 |
| H 0 | -0.164305 | -1.057685 | 0.621156  |
| H 0 | -0.705858 | -2.796082 | -1.031049 |
| H 0 | -1.746646 | -1.674587 | -1.914972 |
| H 0 | -2.164550 | -2.623492 | 0.986046  |
| H 0 | -3.125107 | -3.127963 | -0.404736 |
| H 0 | -4.241611 | -1.352172 | 1.002421  |
| H 0 | 2.964386  | 1.051505  | 0.494180  |
| H 0 | 1.764229  | -0.001911 | 1.218627  |
| H 0 | 3.685765  | -0.797235 | -1.035273 |
| H 0 | 2.468931  | -1.856280 | -0.342238 |
| H 0 | 4.713308  | -2.307520 | 0.679908  |
| H 0 | 3.603385  | -1.692446 | 1.914972  |
| H 0 | 4.828502  | -0.623211 | 1.215476  |
| H 0 | -2.187860 | 2.595305  | 1.105738  |
| H 0 | -0.643842 | 3.127963  | -1.380610 |
| H 0 | -4.828502 | -0.172352 | -0.853808 |

Free Energy (PCM/B3LYP/6-31G\*) = -845.149360  
Number of imaginary frequencies = 0

**Isomer 28**

B3LYP/6-31G\* geometry

|     |          |           |           |
|-----|----------|-----------|-----------|
| O 0 | 0.466218 | -0.951686 | -1.401880 |
|-----|----------|-----------|-----------|

|     |           |           |           |
|-----|-----------|-----------|-----------|
| C 0 | -1.381082 | 0.236712  | -0.357324 |
| C 0 | 0.724752  | 1.423923  | -0.941905 |
| C 0 | -0.431166 | 1.361191  | 0.054684  |
| C 0 | 1.440770  | 0.062763  | -1.081908 |
| C 0 | -0.594360 | -1.092283 | -0.458742 |
| C 0 | -1.499385 | -2.240347 | -0.893206 |
| C 0 | -2.669025 | -2.400515 | 0.093234  |
| C 0 | -3.488940 | -1.115856 | 0.249628  |
| C 0 | -2.583154 | 0.085635  | 0.556512  |
| O 0 | -2.842855 | 0.882775  | 1.447858  |
| C 0 | 2.341754  | -0.314446 | 0.102235  |
| C 0 | 3.106383  | -1.625401 | -0.121871 |
| C 0 | 4.021700  | -1.985964 | 1.052180  |
| O 0 | -1.051192 | 2.646863  | 0.045649  |
| O 0 | 1.666949  | 2.420878  | -0.567200 |
| O 0 | -4.141820 | -0.864078 | -1.001225 |
| H 0 | -1.778840 | 0.448325  | -1.360759 |
| H 0 | 0.287307  | 1.669622  | -1.923688 |
| H 0 | -0.034064 | 1.152841  | 1.059407  |
| H 0 | 2.069513  | 0.108833  | -1.978517 |
| H 0 | -0.180288 | -1.330454 | 0.533758  |
| H 0 | -0.916440 | -3.166633 | -0.937723 |
| H 0 | -1.876976 | -2.039808 | -1.902247 |
| H 0 | -2.287845 | -2.688907 | 1.081578  |
| H 0 | -3.343252 | -3.198277 | -0.236496 |
| H 0 | -4.219530 | -1.214151 | 1.062245  |
| H 0 | 3.049133  | 0.510029  | 0.248631  |
| H 0 | 1.761656  | -0.381977 | 1.031806  |
| H 0 | 3.703881  | -1.539952 | -1.040803 |
| H 0 | 2.391113  | -2.438367 | -0.297553 |
| H 0 | 4.559092  | -2.922673 | 0.864515  |
| H 0 | 3.447206  | -2.110838 | 1.978517  |
| H 0 | 4.768389  | -1.201861 | 1.229070  |
| H 0 | -1.727639 | 2.609953  | 0.745325  |
| H 0 | 1.133409  | 3.198277  | -0.325577 |
| H 0 | -4.768389 | -0.133275 | -0.870259 |

Free Energy (PCM/B3LYP/6-31G\*) = -845.147853  
Number of imaginary frequencies = 0

**Isomer 29**

B3LYP/6-31G\* geometry

|     |           |           |           |
|-----|-----------|-----------|-----------|
| O 0 | 0.143530  | 1.845877  | 1.980472  |
| C 0 | -0.715712 | 1.893787  | 0.839109  |
| C 0 | 0.737762  | 0.665101  | -0.911064 |
| C 0 | -0.690771 | -0.630578 | 0.546942  |
| O 0 | -0.185296 | -0.437234 | -0.773401 |
| C 0 | -1.553567 | 0.604268  | 0.929168  |
| C 0 | 0.094342  | 2.005653  | -0.479019 |
| C 0 | -2.806309 | 0.590159  | 0.083932  |
| C 0 | -3.665155 | -0.661173 | 0.171158  |
| C 0 | -2.777530 | -1.848467 | -0.273883 |
| C 0 | -1.496875 | -1.930778 | 0.565704  |
| O 0 | -0.690142 | 2.573499  | -1.523517 |
| C 0 | 2.096008  | 0.390417  | -0.244964 |
| C 0 | 2.752889  | -0.918785 | -0.699151 |
| C 0 | 4.130984  | -1.138529 | -0.067025 |
| O 0 | -4.821726 | -0.537031 | -0.625150 |
| O 0 | -3.124012 | 1.470902  | -0.712283 |
| H 0 | 0.665912  | 2.664268  | 1.993553  |
| H 0 | -1.377164 | 2.769469  | 0.894546  |
| H 0 | 0.891186  | 0.733207  | -1.993553 |
| H 0 | 0.133209  | -0.703301 | 1.266252  |
| H 0 | -1.867642 | 0.485286  | 1.975192  |
| H 0 | 0.907183  | 2.722183  | -0.302780 |
| H 0 | -3.961316 | -0.813288 | 1.219841  |
| H 0 | -3.363275 | -2.769469 | -0.187716 |
| H 0 | -2.532279 | -1.711655 | -1.333220 |
| H 0 | -1.745983 | -2.162559 | 1.609286  |
| H 0 | -0.857582 | -2.742402 | 0.201764  |
| H 0 | -1.606474 | 2.251581  | -1.419619 |
| H 0 | 2.753878  | 1.233224  | -0.500608 |
| H 0 | 1.999879  | 0.407727  | 0.847156  |
| H 0 | 2.846672  | -0.913922 | -1.794552 |
| H 0 | 2.095499  | -1.761721 | -0.453672 |
| H 0 | 4.578539  | -2.080008 | -0.405707 |
| H 0 | 4.062938  | -1.175873 | 1.027368  |

H O 4.821726 -0.327120 -0.328052  
H O -4.697309 0.285318 -1.138592  
Free Energy (PCM/B3LYP/6-31G\*) = -845.149562  
Number of imaginary frequencies = 0

### Isomer 30

B3LYP/6-31G\* geometry  
O O 0.348078 1.510550 1.771323  
C O -0.580912 1.450892 0.691149  
C O 0.798201 -0.037757 -0.905951  
C O -0.744667 -1.082339 0.646981  
O O -0.201023 -1.049967 -0.676380  
C O -1.498061 0.244150 0.924107  
C O 0.162045 1.347258 -0.654704  
C O -2.771369 0.301655 0.099309  
C O -3.695744 -0.908406 0.184035  
C O -2.895221 -2.177957 -0.163606  
C O -1.658667 -2.305671 0.734820  
O O 1.201522 2.333397 -0.698973  
C O 2.117592 -0.311259 -0.169039  
C O 2.731927 -1.671068 -0.525999  
C O 4.071618 -1.915056 0.175665  
O O -4.808008 -0.738568 -0.667185  
O O -3.076502 1.238394 -0.627099  
H O 1.078103 2.064315 1.436942  
H O -1.189425 2.367628 0.673315  
H O 0.998951 -0.114778 -1.980927  
H O 0.061245 -1.175653 1.384034  
H O -1.803527 0.244247 1.980927  
H O -0.566544 1.525858 -1.453878  
H O -4.035214 -0.986318 1.231107  
H O -3.550088 -3.048892 -0.053943  
H O -2.596584 -2.120942 -1.216331  
H O -1.963740 -2.433514 1.781594  
H O -1.079684 -3.193779 0.459668  
H O 0.786752 3.193779 -0.876114  
H O 2.813270 0.490071 -0.445505  
H O 1.978421 -0.231673 0.914469  
H O 2.871687 -1.730803 -1.615034  
H O 2.027328 -2.470355 -0.265051  
H O 4.490046 -2.891807 -0.093249  
H O 3.957339 -1.889745 1.266509  
H O 4.808008 -1.149045 -0.097438  
H O -4.685436 0.144570 -1.070461  
Free Energy (PCM/B3LYP/6-31G\*) = -845.150845  
Number of imaginary frequencies = 0

### Isomer 31

B3LYP/6-31G\* geometry  
O O -1.684670 2.799837 1.142738  
C O -0.875716 1.660186 0.898502  
C O 0.671985 0.562638 -0.844246  
C O -0.723822 -0.833778 0.555150  
O O -0.186979 -0.593362 -0.745849  
C O -1.682647 0.340173 0.905287  
C O -0.040562 1.858602 -0.388005  
C O -2.866982 0.238508 -0.031213  
C O -3.668664 -1.052097 0.053077  
C O -2.692697 -2.193429 -0.333531  
C O -1.437105 -2.186980 0.546619  
O O -0.840363 2.448063 -1.415697  
C O 2.029955 0.351857 -0.153627  
C O 2.762804 -0.914365 -0.614637  
C O 4.144138 -1.065352 0.030182  
O O -4.792186 -1.007561 -0.796943  
O O -3.151718 1.044972 -0.913753  
H O -1.903041 3.146461 0.257462  
H O -0.178196 1.583303 1.741707  
H O 0.846777 0.662114 -1.920922  
H O 0.080640 -0.857446 1.302649  
H O -2.067134 0.175641 1.920922  
H O 0.725340 2.612427 -0.178367  
H O -4.008253 -1.204185 1.087215  
H O -3.224878 -3.146461 -0.249096  
H O -2.421273 -2.060316 -1.387043  
H O -1.701839 -2.433512 1.582687

H O -0.732604 -2.953386 0.205942  
H O -1.636810 1.890791 -1.533051  
H O 2.646934 1.232089 -0.379841  
H O 1.919263 0.337671 0.939259  
H O 2.867453 -0.889197 -1.708515  
H O 2.150189 -1.794919 -0.387100  
H O 4.644686 -1.977167 -0.314924  
H O 4.067522 -1.119842 1.123193  
H O 4.792186 -0.214847 -0.214804  
H O -4.648229 -0.232825 -1.375356  
Free Energy (PCM/B3LYP/6-31G\*) = -845.151440  
Number of imaginary frequencies = 0

### Isomer 32

B3LYP/6-31G\* geometry  
O O -1.402948 2.630259 0.922231  
C O -0.713858 1.395121 0.729854  
C O 0.734578 0.070630 -0.896129  
C O -0.764492 -1.126273 0.597760  
O O -0.183131 -1.024322 -0.704467  
C O -1.599639 0.147525 0.912691  
C O -0.028530 1.384369 -0.643890  
C O -2.876760 0.170747 0.090146  
C O -3.706915 -1.105930 0.052002  
C O -2.818154 -2.302781 -0.327617  
C O -1.611400 -2.399794 0.613029  
O O 0.858142 2.489820 -0.754837  
C O 2.044515 -0.082127 -0.111039  
C O 2.802593 -1.370867 -0.454056  
C O 4.136463 -1.488949 0.290226  
O O -4.796620 -0.966807 -0.831891  
O O -3.278344 1.160238 -0.517069  
H O -2.171418 2.594981 0.320240  
H O 0.061465 1.379473 1.503573  
H O 0.977790 0.019226 -1.963606  
H O 0.024745 -1.208344 1.356895  
H O -1.919207 0.085848 1.963606  
H O -0.813817 1.454992 -1.412307  
H O -4.072372 -1.262056 1.083342  
H O -3.421071 -3.215752 -0.284782  
H O -2.484522 -2.175495 -1.363118  
H O -1.945594 -2.581986 1.642511  
H O -0.974502 -3.243601 0.327723  
H O 0.364141 3.243601 -0.384440  
H O 2.664260 0.790294 -0.348581  
H O 1.866811 -0.037991 0.971478  
H O 2.982726 -1.403687 -1.538005  
H O 2.172637 -2.238862 -0.223331  
H O 4.658377 -2.415973 0.026448  
H O 3.985638 -1.489009 1.376959  
H O 4.801077 -0.650343 0.048383  
H O -4.801077 -0.025693 -1.095882  
Free Energy (PCM/B3LYP/6-31G\*) = -845.152982  
Number of imaginary frequencies = 0
